# Supplementary material
Source: PubMed Central journal article supplement (PMC3142463)
Supplement: cc1011_1794SD4.pdf [file cc1011_1794SD4.pdf]

**Supplemental Table 4. Intersection with Myofibroblast and Muscle-Related Proteins.**

| <b>Probe</b>          | <b>Symbol</b> | <b>Description</b>                                   | <b>P-value</b> | <b>Fold-Change</b> |
|-----------------------|---------------|------------------------------------------------------|----------------|--------------------|
| ADXEC.2002.C2_at      | MYL5          | myosin light chain 5 regulatory                      | 0.009          | 3.42               |
| ADXEC.1082.C15_s_at   | TPM3          | tropomyosin 3                                        | 0.02           | 3.34               |
| ADXEC.9076.C1_s_at    | PKM2          | pyruvate kinase muscle                               | 0.04           | 2.89               |
| ADXEC.18082.C1_at     | RYR1          | ryanodine receptor 1 (skeletal)                      | 0.004          | 2.73               |
| ADXEC.1471.C1_at      | FABP3         | fatty acid binding protein 3 muscle and heart        | 0.0005         | 2.57               |
| ADXECNTDJ.2647_at     | MYH11         | myosin heavy chain 11 smooth muscle isoform 2        | 0.02           | 2.51               |
| ADXPCEC.205.C2_x_at   | MYH11         | myosin heavy chain 11 smooth muscle isoform 2        | 0.03           | 1.50               |
| ADXECNTDJ.3106_at     | TNC           | tenascin C                                           | 0.05           | 2.35               |
| ADXECAD.23141_at      | DMD           | dystrophin, transcript variant Dp71ab                | 0.05           | 2.28               |
| ADXECAD.19332_s_at    | CFL2          | cofilin 2 (muscle)                                   | 0.05           | 1.88               |
| ADXEC.9209.C1_at      | CTF1          | cardiotrophin 1                                      | 0.03           | 1.73               |
| ADXEC.9209.C1_x_at    | CTF1          | cardiotrophin 1.                                     | 0.004          | 1.44               |
| ADXEC.24147.C1-a_s_at | MBNL3         | muscleblind-like 3 (Drosophila)                      | 0.03           | 1.77               |
| ADXEC.12925.C1_at     | SGCA          | sarcoglycan alpha (50kDa dystrophin-associated       | 0.03           | 1.70               |
| ADXEC.1114.C2-a_s_at  | CAPZA1        | capping protein (actin filament) muscle Z-line alpha | 0.02           | 1.52               |
