# Supplementary material
Source: PubMed Central journal article supplement (PMC3142463)
Supplement: cc1011_1794SD5.pdf [file cc1011_1794SD5.pdf]

**Supplemental Table 5. Intersection with Autophagy and Lysosome Associated Gene Products.**

| Probe                                      | Symbol   | Description                                                    | P-value | Fold-Change |
|--------------------------------------------|----------|----------------------------------------------------------------|---------|-------------|
| <b><u>Autophagy Associated Genes</u></b>   |          |                                                                |         |             |
| ADXEC.686.C6_s_at                          | CTSB     | cathepsin B, transcript variant 4                              | 0.01    | 3.51        |
| ADXEC.686.C3_s_at                          | CTSB     | cathepsin B, transcript variant 4                              | 0.01    | 2.23        |
| ADXECNTDJ.8315_s_at                        | CTSB     | cathepsin B, transcript variant 3                              | 0.004   | 2.12        |
| ADXEC.8712.C1-a_s_at                       | CXCR4    | chemokine (C-X-C motif) receptor 4                             | 0.013   | 2.53        |
| ADXEC.8712.C1_at                           | CXCR4    | chemokine (C-X-C motif) receptor 4                             | 0.02    | 1.60        |
| ADXECEMUTR.7992_at                         | CISD2    | CDGSH iron sulfur domain 2                                     | 0.04    | 2.50        |
| ADXEC.1987.C1_at                           | C12orf44 | ATG101; chromosome 12 open reading frame 44                    | 0.05    | 1.96        |
| ADXECADEA.21291_at                         | DAPK1    | death-associated protein kinase 1                              | 0.03    | 1.77        |
| ADXECEMUTR.419_at                          | CLTC     | Clathrin heavy chain (Hc)                                      | 0.009   | 1.77        |
| ADXEC.3547.C2-a_s_at                       | PARP1    | poly (ADP-ribose) polymerase 1                                 | 0.02    | 1.73        |
| ADXEC.15023.C1_at                          | RAF1     | v-raf-1 murine leukemia viral oncogene homolog 1               | 0.05    | 1.71        |
| ADXEC.21098.C1_at                          | HSPA5    | heat shock 70kDa protein 5 (glucose-regulated protein)         | 0.02    | 1.68        |
| ADXEC.23021.C2_at                          | PACRGL   | PARK2 co-regulated-like                                        | 0.014   | 1.67        |
| ADXECADEA.25947_s_at                       | ATG12    | ATG12 autophagy related 12 homolog (S. cerevisiae)             | 0.01    | 1.66        |
| ADXEC.23157.C1_s_at                        | GNAI3    | G protein alpha inhibiting activity polypeptide 3              | 0.03    | 1.60        |
| ADXEC.4544.C1_at                           | RGS19    | regulator of G-protein signaling 19                            | 0.04    | 1.60        |
| ADXEC.2435.C10_s_at                        | FKBP1A   | FK506 binding protein 1A 12kDa                                 | 0.04    | 1.56        |
| ADXEC.29514.C1_at                          | MAPK1    | mitogen-activated protein kinase 1                             | 0.03    | 1.52        |
| ADXEC.2311.C2-a_s_at                       | MAP1LC3B | microtubule-associated protein1 light-chain3 beta; LC3B; ATG8F | 0.05    | 1.50        |
| ADXEC.3966.C2_x_at                         | GAA      | glucosidase alpha                                              | 0.05    | 1.50        |
| ADXEC.3894.C1_at                           | SH3GLB1  | SH3-domain GRB2-like endophilin B1                             | 0.02    | 1.32        |
| ADXEC.3576.C1_x_at                         | LAMP2    | lysosomal-associated membrane protein 2 (LAMP2)                | 0.01    | 1.25        |
| <b><u>Lysosomal Proteases</u></b>          |          |                                                                |         |             |
| ADXEC.686.C6_s_at                          | CTSB     | cathepsin B, transcript variant 4                              | 0.01    | 3.51        |
| ADXEC.686.C3_s_at                          | CTSB     | cathepsin B, transcript variant 4                              | 0.01    | 2.23        |
| ADXECNTDJ.8315_s_at                        | CTSB     | cathepsin B, transcript variant 3                              | 0.004   | 2.12        |
| ADXECNTDJ.2873_s_at                        | CTSZ     | cathepsin Z                                                    | 0.04    | 2.14        |
| ADXEC.3377.C1_s_at                         | CTSS     | cathepsin S                                                    | 0.01    | 1.72        |
| <b><u>Lysosome-Associated Proteins</u></b> |          |                                                                |         |             |
| ADXEC.13002.C1_s_at                        | VPS26B   | vacuolar protein sorting 26 homolog B (S. pombe)               | 0.003   | 3.23        |
| ADXEC.22845.C1_s_at                        | ATP6AP1L | ATPase H transporting lysosomal accessory protein 1-like       | 0.03    | 2.06        |
| ADXEC.6107.C3-a_s_at                       | ATP6V0D1 | ATPase H transporting lysosomal 38kDa V0 subunit               | 0.05    | 2.03        |
| ADXEC.9707.C1_at                           | LAPTM5   | lysosomal protein transmembrane 5                              | 0.03    | 1.78        |
| ADXECADEA.19246_s_at                       | RAB7A    | RAB7A member RAS oncogene family                               | 0.05    | 1.75        |
| ADXECADEA.11579_x_at                       | SMPD1    | sphingomyelin phosphodiesterase 1 acid lysosomal               | 0.02    | 2.02        |
| ADXEC.4627.C3_s_at                         | SLC15A3  | solute carrier family 15 member 3                              | 0.03    | 1.74        |
| ADXECNTDJ.546_s_at                         | SLC15A3  | solute carrier family 15 member 3                              | 0.03    | 1.66        |
| ADXEC.22227.C1_s_at                        | FNBP1    | Formin binding protein 1                                       | 0.01    | 1.66        |

|                      |          |                                                                |      |      |      |
|----------------------|----------|----------------------------------------------------------------|------|------|------|
| ADXEC.25133.C1_at    | VPS13A   | vacuolar protein sorting 13 homolog A ( <i>S. cerevisiae</i> ) | 0.04 | 1.63 |      |
| ADXOCEC.1467.C1_x_at | TRIP10   | thyroid hormone receptor interactor 10                         |      | 0.05 | 1.62 |
| ADXEC.4957.C1_s_at   | GM2A     | GM2 ganglioside activator                                      |      | 0.02 | 1.58 |
| ADXEC.8005.C1_at     | GM2A     | GM2 ganglioside activator                                      |      | 0.03 | 1.46 |
| ADXEC.28432.C1_s_at  | HPS1     | Hermansky-Pudlak syndrome 1                                    |      | 0.03 | 2.69 |
| ADXEC.342.C1_at      | DNASE2   | deoxyribonuclease II lysosomal                                 |      | 0.02 | 2.40 |
| ADXEC.30575.C1_x_at  | PCYOX1   | prenylcysteine oxidase 1                                       |      | 0.02 | 2.41 |
| ADXEC.23032.C1_at    | CD68     | CD68 molecule                                                  |      | 0.04 | 2.21 |
| ADXEC.17916.C1_at    | RAB14    | RAB14 member RAS oncogene family                               |      | 0.04 | 2.11 |
| ADXECAD.28808_s_at   | WDR48    | WD repeat domain 48                                            |      | 0.04 | 2.00 |
| ADXEC.522.C5_at      | HLA-DRB1 | HLA class II DR-beta 1                                         |      | 0.03 | 1.80 |
| ADXEC.9777.C1_at     | VAMP7    | vesicle-associated membrane protein 7                          |      | 0.01 | 1.76 |
| ADXECAD.1571_s_at    | ASAH1    | N-acylsphingosine amidohydrolase (acid ceramidase) 1           |      | 0.04 | 1.52 |
| ADXEC.3966.C2_x_at   | GAA      | glucosidase alpha                                              |      | 0.05 | 1.50 |
| ADXEC.3966.C1_s_at   | GAA      | glucosidase alpha                                              |      | 0.02 | 1.29 |
| ADXPCEC.3315.C3_s_at | HEXA     | hexosaminidase A (alpha polypeptide)                           |      | 0.04 | 1.45 |
| ADXECAD.1876_at      | ARL8A    | ADP-ribosylation factor-like 8A                                |      | 0.01 | 1.42 |
| ADXECAD.1588_x_at    | LITAF    | lipopolysaccharide-induced TNF factor                          |      | 0.01 | 1.39 |
| ADXEC.28670.C1_s_at  | NSUN3    | NOP2/Sun domain family member 3                                |      | 0.04 | 1.36 |
| ADXEC.3576.C1_x_at   | LAMP2    | lysosomal-associated membrane protein 2                        |      | 0.01 | 1.25 |

---
