# Supplementary material
Source: PubMed Central journal article supplement (PMC3142463)
Supplement: cc1011_1794SD6.pdf [file cc1011_1794SD6.pdf]

**Supplemental Table 6. Intersection with the Immune Response and TNF/NFkB Signaling.**

| <b>Probe</b>                     | <b>Symbol</b> | <b>Description</b>                                         | <b>P-value</b> | <b>Fold-Change</b> |
|----------------------------------|---------------|------------------------------------------------------------|----------------|--------------------|
| <b><u>TNF/NFkB Signaling</u></b> |               |                                                            |                |                    |
| ADXECRS.14061_at                 | TNFSF8        | tumor necrosis factor (ligand) superfamily member 8        | 0.03           | 2.96               |
| ADXEC.10083.C2_s_at              | NKIRAS2       | NFkB inhibitor interacting Ras-like 2                      | 0.01           | 2.65               |
| ADXEC.14397.C2-a_s_at            | TNFSF13       | tumor necrosis factor (ligand) superfamily member 13       | 0.04           | 1.96               |
| ADXECAD.6255_at                  | TIFA          | TRAF-interacting protein with forkhead-associated          | 0.04           | 1.71               |
| ADXEC.4272.C1_at                 | AZI2          | 5-azacytidine induced 2                                    | 0.03           | 1.62               |
| ADXECAD.28179_s_at               | TAB2          | TGF-beta activated kinase 1/MAP3K7 binding protein 2       | 0.03           | 1.59               |
| ADXECAD.6191_x_at                | NKIRAS1       | NFkB inhibitor interacting Ras-like 1.                     | 0.05           | 1.57               |
| ADXECAD.1588_x_at                | LITAF         | lipopolysaccharide-induced TNF factor                      | 0.01           | 1.39               |
| ADXEC.26052.C1_at                | EDA           | ectodysplasin A, transcript variant 2                      | 0.02           | 1.39               |
| ADXECRS.39033_at                 | EDA           | ectodysplasin A, transcript variant 4                      | 0.031          | 1.38               |
| ADXEC.31072.C1_at                | TRIM38        | hereditary haemochromatosis region histone 2A-like protein | 0.02           | 1.35               |
| <b><u>Immune Response</u></b>    |               |                                                            |                |                    |
| ADXECNTDJ.7965_at                | IL2RG         | IL2RG mRNA for IL2RG nirs variant 1                        | 0.02           | 3.50               |
| ADXEC.3341.C2_x_at               | FCGR2B        | Fc fragment of IgG low affinity IIb receptor (CD32)        | 0.02           | 3.27               |
| ADXOCEC.4815.C3_x_at             | FCGR2B        | Fc fragment of IgG low affinity IIb receptor (CD32)        | 0.008          | 3.10               |
| ADXECNTDJ.9365_s_at              | PLEKHA2       | pleckstrin homology domain containing family A             | 0.01           | 2.96               |
| ADXEC.12456.C1_at                | NOD2          | NOD2 gene for LRR-containing protein exons 1-11            | 0.006          | 2.90               |
| ADXECAD.22944_s_at               | NCF4          | neutrophil cytosolic factor 4 40kDa                        | 0.03           | 2.84               |
| ADXECAD.18616_s_at               | TRGV3         | T cell receptor gamma variable 3 mRNA                      | 0.03           | 2.69               |
| ADXECEMUTR.2840_x_at             | TRGV3         | T cell receptor gamma variable 3 mRNA                      | 0.02           | 2.68               |
| ADXECEMUTR.3960_at               | SAMHD1        | SAM domain and HD domain 1                                 | 0.003          | 2.52               |
| ADXECADA.18529_at                | IL4R          | interleukin 4 receptor                                     | 0.0292         | 2.34               |
| ADXEC.6133.C7_x_at               | LILRB2        | leukocyte immunoglobulin-like receptor subfamily B         | 0.040          | 2.34               |
| ADXEC.12396.C1_at                | CX3CL1        | chemokine (C-X3-C motif) ligand 1                          | 0.03           | 2.31               |
| ADXECAD.24150_at                 | FCGR2C        | cell-type natural killer cells Fc gamma receptor RIIc4     | 0.01           | 2.16               |
| ADXEC.27117.C1-a_s_at            | STAT6         | signal transducer and activator of transcription 6         | 0.03           | 2.15               |
| ADXECNTDJ.4196_s_at              | CD274         | CD274 molecule                                             | 0.05           | 2.10               |
| ADXEC.14397.C2-a_s_at            | TNFSF13       | tumor necrosis factor (ligand) superfamily member 13       | 0.04           | 1.96               |
| ADXEC.3720.C1_at                 | FCAR          | Fc fragment of IgA receptor                                | 0.04           | 1.92               |
| ADXEC.20792.C1_at                | GPR65         | G protein-coupled receptor 65                              | 0.04           | 1.92               |
| ADXEC.3341.C1_x_at               | FCGR2B        | Fc fragment of IgG low affinity IIb receptor (CD32)        | 0.0307         | 1.85               |
| ADXECNTDJ.6431_s_at              | CD8A          | CD8a molecule                                              | 0.04           | 1.81               |
| ADXECRS.325_s_at                 | SEMA4D        | sema domain immunoglobulin domain (Ig) transmembrane       | 0.03           | 1.73               |
| ADXEC.20525.C1_s_at              | LST1          | leukocyte specific transcript 1                            | 0.04           | 1.73               |
| ADXEC.20525.C2_s_at              | LST1          | leukocyte specific transcript 1                            | 0.04           | 1.69               |
| ADXEC.15802.C1_at                | TREM2         | triggering receptor expressed on myeloid cells 2           | 0.0236         | 1.66               |
| ADXEC.30362.C1_at                | GPR65         | G protein-coupled receptor 65                              | 0.05           | 1.49               |
| ADXEC.26052.C1_at                | EDA           | ectodysplasin A, transcript variant 2                      | 0.02           | 1.39               |
| ADXECRS.39033_at                 | EDA           | ectodysplasin A (EDA) transcript variant 4                 | 0.03           | 1.38               |

|                    |         |                                                     |        |      |
|--------------------|---------|-----------------------------------------------------|--------|------|
| ADXEC.2294.C1_x_at | ARHGDIB | Rho GDP dissociation inhibitor (GDI) beta           | 0.009  | 1.32 |
| ADXECS.24303_at    | ENDOU   | endonuclease polyU-specific                         | 0.04   | 1.27 |
| ADXECEMUTR.3539_at | RAET1E  | RAET1E2                                             | 0.02   | 1.26 |
| ADXEC.2294.C1_at   | ARHGDIB | Rho GDP dissociation inhibitor (GDI) beta (ARHGDIB) | 0.0504 | 1.24 |

---
