# Supplementary material
Source: PubMed Central journal article supplement (PMC3142463)
Supplement: cc1011_1794SD7.pdf [file cc1011_1794SD7.pdf]

**Supplemental Table 7. Intersection with Breast Tumors Derived from BRCA1-positive Patients.**

| <b>Probe</b>          | <b>Symbol</b> | <b>Description</b>                                    | <b>P-value</b> | <b>Fold-Change</b> |
|-----------------------|---------------|-------------------------------------------------------|----------------|--------------------|
| ADXEC.2081.C1_s_at    | ISG20         | interferon stimulated exonuclease gene 20kDa          | 0.03           | 3.5                |
| ADXEC.18483.C2_at     | TRAF3IP3      | TRAF3 interacting protein 3                           | 0.01           | 2.97               |
| ADXEC.9513.C1_x_at    | IRF5          | interferon regulatory factor 5                        | 0.05           | 2.73               |
| ADXEC.9513.C1_at      | IRF5          | interferon regulatory factor 5                        | 0.04           | 2.65               |
| ADXEC.17138.C1_at     | NOLC1         | nucleolar and coiled-body phosphoprotein 1            | 0.03           | 2.57               |
| ADXECAD.1752_at       | XRN1          | 5-3 exoribonuclease 1                                 | 0.03           | 2.53               |
| ADXEC.12903.C1_s_at   | TRIP6         | thyroid hormone receptor interactor 6                 | 0.005          | 2.38               |
| ADXEC.12903.C3_s_at   | TRIP6         | thyroid hormone receptor interactor 6                 | 0.01           | 2.09               |
| ADXEC.10647.C1-a_s_at | ZNF644        | zinc finger protein 644                               | 0.04           | 2.28               |
| ADXEC.17138.C1_x_at   | NOLC1         | nucleolar and coiled-body phosphoprotein 1            | 0.02           | 2.23               |
| Adx-200054-up_s_at    | ZNF259        | zinc finger protein 259                               | 0.04           | 2.21               |
| ADXEC.28650.C1_at     | PHF20L1       | PHD finger protein 20-like 1                          | 0.006          | 2.16               |
| ADXEC.28650.C1_x_at   | PHF20L1       | PHD finger protein 20-like 1                          | 0.01           | 2.14               |
| ADXECAD.13209_at      | TTC7A         | Tetratricopeptide repeat domain 7A                    | 0.04           | 1.98               |
| ADXEC.20469.C1_at     | SFT2D2        | SFT2 domain containing 2                              | 0.04           | 1.96               |
| ADXEC.1043.C1-a_s_at  | BYSL          | bystin-like                                           | 0.05           | 1.96               |
| ADXEC.29114.C1_x_at   | CXCR3         | chemokine (C-X-C motif) receptor 3                    | 0.05           | 1.82               |
| ADXECRS.325_s_at      | SEMA4D        | sema domain immunoglobulin domain (Ig) transmembrane  | 0.03           | 1.73               |
| ADXEC.2675.C1_at      | MTF2          | metal response element binding transcription factor 2 | 0.04           | 1.65               |
| ADXEC.11414.C1_s_at   | ODF2L         | mRNA for KIAA1229 protein partial cds.                | 0.0173         | 1.63               |
