# Supplementary material
Source: PubMed Central journal article supplement (PMC3142463)
Supplement: cc1011_1794SD8.pdf [file cc1011_1794SD8.pdf]

**Supplemental Table 8. Intersection with Breast Tumors Derived from ER-negative Patients.**

| <b>Probe</b>          | <b>Symbol</b> | <b>Description</b>                                                  | <b>P-value</b> | <b>Fold-Change</b> |
|-----------------------|---------------|---------------------------------------------------------------------|----------------|--------------------|
| ADXECNTDJ.1029_s_at   | TRIT1         | tRNA isopentenyl-transferase 1                                      | 0.005          | 4.38               |
| ADXECAD.26784_s_at    | KLRD1         | killer cell lectin-like receptor subfamily D member 1               | 0.03           | 3.74               |
| ADXEC.2081.C1_s_at    | ISG20         | Interferon stimulated exonuclease gene 20kDa                        | 0.03           | 3.50               |
| ADXECNTDJ.5475_s_at   | FNDC3B        | fibronectin type III domain containing 3B                           | 0.04           | 3.00               |
| ADXECRS.22704_s_at    | PSMB9         | proteasome (prosome macropain) subunit beta type 9                  | 0.003          | 2.98               |
| ADXEC.18483.C2_at     | TRAF3IP3      | TRAF3 interacting protein 3                                         | 0.01           | 2.97               |
| ADXLCEC.3953.C1_at    | CD86          | CD86 molecule                                                       | 0.02           | 2.88               |
| ADXECNTDJ.7829_s_at   | CD53          | CD53 molecule                                                       | 0.004          | 2.87               |
| ADXEC.23283.C1_s_at   | EZH2          | enhancer of zeste homolog 2 (Drosophila)                            | 0.02           | 2.77               |
| ADXECADA.18168_at     | CHAF1A        | SH3-containing protein EEN (EEN) and chromatin assembly-factorI p15 | 0.01           | 2.75               |
| ADXEC.9513.C1_x_at    | IRF5          | interferon regulatory factor 5                                      | 0.05           | 2.73               |
| ADXEC.9513.C1_at      | IRF5          | interferon regulatory factor 5                                      | 0.04           | 2.65               |
| ADXEC.583.C2_s_at     | C1QB          | complement component 1 q subcomponent B chain                       | 0.04           | 2.63               |
| ADXEC.22119.C1_x_at   | HMGB3         | highmobility group box 3                                            | 0.05           | 2.61               |
| ADXECAD.1752_at       | XRN1          | 5'-3' exoribonuclease 1                                             | 0.03           | 2.53               |
| ADXEC.8712.C1-a_s_at  | CXCR4         | chemokine (CXC motif) receptor 4                                    | 0.01           | 2.53               |
| ADXECEMUTR.3960_at    | SAMHD1        | SAM domain and HD domain 1                                          | 0.003          | 2.52               |
| ADXECEMUTR.278_s_at   | SLC25A37      | solute carrier family 25 member 37                                  | 0.03           | 2.51               |
| ADXEC.22509.C1_at     | OAS2          | 2'-5'-oligoadenylate synthetase 2, 69/71kDa                         | 0.04           | 2.50               |
| ADXEC.6876.C1_at      | SRPRB         | signal recognition particle receptor B subunit                      | 0.05           | 2.42               |
| ADXEC.12903.C1_s_at   | TRIP6         | thyroid hormone receptor interactor 6                               | 0.005          | 2.38               |
| ADXEC.2738.C1_s_at    | PLAUR         | plasminogen activator urokinase receptor                            | 0.05           | 2.36               |
| ADXEC.6557.C2_s_at    | HTATIP2       | HIV1 Tat interactive protein 2 30kDa                                | 0.02           | 2.33               |
| ADXEC.60.C3_at        | NCF2          | neutrophil cytosolic factor 2                                       | 0.05           | 2.32               |
| ADXEC.12396.C1_at     | CX3CL1        | chemokine (CX3C motif) ligand 1                                     | 0.03           | 2.31               |
| ADXECAD.23141_at      | DMD           | dystrophin (DMD) transcript variant Dp71ab                          | 0.05           | 2.28               |
| ADXEC.1226.C2_x_at    | TYMS          | gene for thymidylate synthase                                       | 0.02           | 2.27               |
| ADXEC.1226.C2_at      | TYMS          | gene for thymidylate synthase                                       | 0.01           | 2.24               |
| Adx-200054-up_s_at    | ZNF259        | zinc finger protein 259                                             | 0.04           | 2.21               |
| ADXEC.22145.C1_at     | ETV5          | Ets variant 5                                                       | 0.04           | 2.18               |
| ADXEC.21162.C2_s_at   | UCK2          | uridine-cytidine kinase 2                                           | 0.008          | 2.17               |
| ADXECNTDJ.2692_s_at   | KIF3C         | kinesin family member 3C                                            | 0.03           | 2.16               |
| ADXECRS.39826_at      | PGK1          | phosphoglycerate kinase 1                                           | 0.05           | 2.16               |
| ADXEC.31137.C1_at     | DAPP1         | dual adaptor of phosphotyrosine and 3-phosphoinositides             | 0.03           | 2.14               |
| ADXEC.8915.C1-a_s_at  | PTPRC         | protein tyrosine phosphatase receptor type C                        | 0.04           | 2.12               |
| ADXEC.22252.C1-a_s_at | RIT1          | Ras-like without CAAX 1                                             | 0.01           | 2.11               |
| ADXEC.12903.C3_s_at   | TRIP6         | thyroid hormone receptor interactor 6                               | 0.01           | 2.09               |
| ADXEC.1986.C1_s_at    | NARF          | nuclear prelamin A recognition factor                               | 0.03           | 2.04               |
| ADXEC.13555.C1_at     | SLA           | Src-like-adaptor                                                    | 0.04           | 2.03               |
| ADXEC.2392.C9_x_at    | CHAF1A        | SH3containing protein EEN (EEN) and chromatin assemblyfactorI p15   | 0.05           | 2.02               |
| ADXECRS.35893_x_at    | CD3G          | CD3g molecule gamma (CD3TCR complex)                                | 0.03           | 2.01               |
| ADXECAD.13209_at      | TTC7A         | tetratricopeptide repeat domain 7A                                  | 0.04           | 1.98               |
| ADXEC.2920.C1_at      | CHD7          | chromodomain helicase DNA binding protein 7                         | 0.05           | 1.97               |

|                       |          |                                                         |        |      |
|-----------------------|----------|---------------------------------------------------------|--------|------|
| ADXEC.32742.C1_s_at   | NDRG1    | N-myc downstream regulated 1                            | 0.04   | 1.97 |
| ADXEC.20469.C1_at     | SFT2D2   | SFT2 domain containing 2                                | 0.04   | 1.96 |
| ADXEC.1043.C1-a_s_at  | BYSL     | bystin-like                                             | 0.05   | 1.96 |
| ADXEC.8794.C1_at      | CD53     | CD53 molecule                                           | 0.04   | 1.92 |
| ADXECAD.18989_at      | CHD7     | chromodomain helicase DNA binding protein 7             | 0.04   | 1.92 |
| ADXEC.4619.C1-a_s_at  | FANCA    | Fanconi anemia complementation group A                  | 0.04   | 1.90 |
| ADXEC.11501.C1_s_at   | NUP93    | nucleoporin 93kDa                                       | 0.02   | 1.89 |
| ADXEC.3918.C1_s_at    | CREB3L2  | cAMP responsive element binding protein 3-like 2        | 0.03   | 1.87 |
| ADXEC.16609.C1_at     | GIT2     | G protein-coupled receptor kinase interacting Arf-GAP 2 | 0.05   | 1.85 |
| ADXOCEC.10681.C1_at   | TTL4     | tubulin tyrosine ligaselike family member 4             | 0.02   | 1.83 |
| ADXEC.29114.C1_x_at   | CXCR3    | chemokine (CXC motif) receptor 3                        | 0.05   | 1.82 |
| ADXECADA.13436_at     | CCDC93   | coiled-coil domain containing 93                        | 0.03   | 1.81 |
| ADXECAD.2809_x_at     | KIF1B    | kinesin family member 1B                                | 0.008  | 1.80 |
| ADXEC.2201.C2_s_at    | RNASE1   | ribonuclease RNase A family 1 (pancreatic)              | 0.002  | 1.79 |
| ADXEC.9707.C1_at      | LAPTM5   | lysosomal protein transmembrane 5                       | 0.03   | 1.78 |
| ADXECADA.21291_at     | DAPK1    | death-associated protein kinase 1                       | 0.03   | 1.77 |
| ADXEC.20402.C1_s_at   | CORO1C   | coronin actin binding protein 1C                        | 0.04   | 1.77 |
| ADXEC.8794.C1_x_at    | CD53     | CD53 molecule                                           | 0.04   | 1.76 |
| ADXEC.29628.C1_at     | NF2      | NF2 gene                                                | 0.02   | 1.76 |
| ADXEC.1926.C1_s_at    | TYROBP   | TYRO protein tyrosine kinase binding protein            | 0.0008 | 1.75 |
| ADXEC.22969.C1_at     | TRIM22   | tripartite motifcontaining 22                           | 0.02   | 1.74 |
| ADXEC.22969.C1_s_at   | TRIM22   | tripartite motifcontaining 22                           | 0.03   | 1.68 |
| ADXEC.4627.C3_s_at    | SLC15A3  | solute carrier family 15 member 3                       | 0.03   | 1.74 |
| ADXECNTDJ.546_s_at    | SLC15A3  | solute carrier family 15 member 3                       | 0.03   | 1.66 |
| ADXECRS.325_s_at      | SEMA4D   | sema domain immunoglobulin domain (Ig) transmembrane    | 0.03   | 1.73 |
| ADXEC.22227.C1_s_at   | FNBP1    | formin binding protein 1                                | 0.01   | 1.66 |
| ADXEC.2675.C1_at      | MTF2     | metal response element binding transcription factor 2   | 0.04   | 1.65 |
| ADXEC.11414.C1_s_at   | ODF2L    | outer dense fiber of sperm tails 2-like                 | 0.02   | 1.63 |
| ADXEC.1998.C1_at      | GALK1    | galactokinase 1                                         | 0.02   | 1.62 |
| ADXEC.8712.C1_at      | CXCR4    | hemokine (CXC motif) receptor 4                         | 0.02   | 1.60 |
| ADXECAD.9496_at       | CDK6     | cyclin-dependent kinase 6                               | 0.04   | 1.60 |
| ADXECNTDJ.82_s_at     | FYB      | FYN binding protein                                     | 0.05   | 1.60 |
| ADXEC.2481.C1_at      | RBM28    | RNA binding motif protein 28                            | 0.05   | 1.58 |
| ADXEC.2959.C3_s_at    | COPG     | coatomer protein complex subunit gamma                  | 0.05   | 1.54 |
| ADXEC.16562.C1_s_at   | CCNJ     | cyclin J                                                | 0.03   | 1.54 |
| ADXECADA.1528_s_at    | CCNJ     | cyclin J                                                | 0.02   | 1.44 |
| ADXEC.5483.C1_at      | NFE2L3   | NFE2-related factor 3                                   | 0.05   | 1.51 |
| ADXEC.1260.C8_s_at    | PSMB4    | proteasome (prosome macropain) subunit beta type 4      | 0.03   | 1.51 |
| ADXECRS.34598_x_at    | PDK3     | pyruvate dehydrogenase kinase                           | 0.03   | 1.49 |
| ADXEC.15900.C1-a_s_at | FAM60A   | family with sequence similarity 60 member A             | 0.03   | 1.43 |
| ADXECAD.20409_s_at    | IVNS1ABP | influenza virus NS1A binding protein                    | 0.04   | 1.43 |
| ADXPCEC.15942.C1_x_at | CCR2     | chemokine (C-C motif) receptor 2                        | 0.02   | 1.41 |
| ADXEC.20377.C1-a_s_at | SOAT1    | sterol O-acyl-transferase 1                             | 0.02   | 1.40 |
| ADXECAD.5485_at       | INTS7    | Integrator complex subunit 7                            | 0.04   | 1.40 |
| ADXECAD.9838_s_at     | RRBP1    | ribosome binding protein 1 homolog 180kDa (dog)         | 0.005  | 1.34 |
| ADXECNTDJ.6223_s_at   | IFRD1    | interferon-related developmental regulator 1            | 0.02   | 1.28 |

|                     |         |                                                            |       |      |
|---------------------|---------|------------------------------------------------------------|-------|------|
| ADXEC.11850.C1_at   | RSU1    | Ras suppressor protein 1                                   | 0.05  | 1.28 |
| ADXEC.3867.C1_x_at  | HAAO    | 3-hydroxyanthranilate 3,4-dioxygenase                      | 0.03  | 1.26 |
| ADXEC.3576.C1_x_at  | LAMP2   | lysosomal-associated membrane protein 2 (LAMP2)            | 0.01  | 1.25 |
| ADXECRS.8473_at     | GAPDHS  | glyceraldehyde-3-phosphate dehydrogenase, spermatogenic    | 0.002 | 1.24 |
| ADXECNTDJ.7956_s_at | IRF5    | interferon regulatory factor 5                             | 0.04  | 1.22 |
| ADXECRS.24092_x_at  | ADAMTS7 | ADAM metalloproteinase with thrombospondin type 1 motif, 7 | 0.02  | 1.22 |
| ADXEC.14042.C1_x_at | SOX8    | SRY (sex determining region Y) box 8                       | 0.04  | 1.22 |

---
