# Supplementary material
Source: PubMed Central journal article supplement (PMC3142463)
Supplement: cc1011_1794SD9.pdf [file cc1011_1794SD9.pdf]

**Supplemental Table 9. Intersection with Key Regulators of Apoptosis.**

| <b><u>Probe</u></b>   | <b><u>Symbol</u></b> | <b><u>Description</u></b>                            | <b><u>P-value</u></b> | <b><u>Fold-Change</u></b> |
|-----------------------|----------------------|------------------------------------------------------|-----------------------|---------------------------|
| ADXEC.9453.C1_x_at    | PEG10                | paternally expressed 10, transcript variant 2        | 0.03                  | 7.60                      |
| ADXEC.9453.C1_at      | PEG10                | paternally expressed 10, transcript variant 2        | 0.03                  | 6.95                      |
| ADXECRS.12320_at      | PEG3                 | paternally expressed 3, transcript variant 5         | 0.03                  | 5.25                      |
| ADXEC.4008.C2_s_at    | DFFA                 | DNA fragmentation factor 45kDa alpha polypeptide     | 0.01                  | 3.94                      |
| ADXEC.686.C6_s_at     | CTSB                 | cathepsin B                                          | 0.01                  | 3.51                      |
| ADXEC.686.C3_s_at     | CTSB                 | cathepsin B                                          | 0.01                  | 2.23                      |
| ADXECNTDJ.8315_s_at   | CTSB                 | cathepsin B                                          | 0.004                 | 2.12                      |
| ADXECNTDJ.3576_s_at   | VCP                  | valosin-containing protein                           | 0.01                  | 3.24                      |
| ADXECAD.15182_at      | BCL2L11              | BCL2-like 11 (apoptosis facilitator)                 | 0.0009                | 3.10                      |
| ADXECRS.14061_at      | TNFSF8               | tumor necrosis factor (ligand) superfamily member 8  | 0.03                  | 2.96                      |
| ADXECAD.20904_s_at    | DEDD                 | death effector domain containing                     | 0.04                  | 2.70                      |
| ADXEC.6850.C1-a_s_at  | DNAJB6               | DnaJ (Hsp40) homolog subfamily B member 6            | 0.04                  | 2.63                      |
| ADXEC.989.C2_at       | BTG1                 | B-cell translocation gene 1 anti-proliferative       | 0.02                  | 2.54                      |
| ADXEC.8712.C1-a_s_at  | CXCR4                | chemokine (C-X-C motif) receptor 4                   | 0.01                  | 2.53                      |
| ADXEC.8712.C1_at      | CXCR4                | chemokine (C-X-C motif) receptor 4                   | 0.02                  | 1.60                      |
| ADXEC.16866.C1_at     | ADORA1               | adenosine A1 receptor                                | 0.03                  | 2.43                      |
| ADXEC.1893.C2_s_at    | LY86                 | lymphocyte antigen 86                                | 0.01                  | 2.33                      |
| ADXEC.6557.C2_s_at    | HTATIP2              | HIV-1 Tat interactive protein 2 30kDa                | 0.02                  | 2.33                      |
| ADXEC.20945.C1_at     | BARD1                | BRCA1 associated RING domain 1                       | 0.03                  | 2.24                      |
| ADXECAD.20607_s_at    | SRGN                 | serglycin                                            | 0.04                  | 2.20                      |
| ADXECAD.28846_s_at    | CASP2                | caspase 2 apoptosis-related cysteine peptidase       | 0.01                  | 2.19                      |
| ADXEC.8915.C1-a_s_at  | PTPRC                | protein tyrosine phosphatase receptor type C         | 0.04                  | 2.12                      |
| ADXEC.23124.C1_x_at   | NLRP1                | NLR family pyrin domain containing 1                 | 0.03                  | 2.09                      |
| ADXECRS.35893_x_at    | CD3G                 | CD3g molecule gamma (CD3-TCR complex).               | 0.03                  | 2.01                      |
| ADXEC.20792.C1_at     | GPR65                | G protein-coupled receptor 65                        | 0.04                  | 1.92                      |
| ADXEC.22819.C1-a_s_at | NAIP                 | NLR family apoptosis inhibitory protein              | 0.04                  | 1.92                      |
| ADXEC.21981.C1_at     | FAIM3                | Fas apoptotic inhibitory molecule 3                  | 0.05                  | 1.90                      |
| ADXECADA.22882_s_at   | PDCD2                | programmed cell death 2                              | 0.04                  | 1.89                      |
| ADXEC.1293.C1_s_at    | KIAA1967             | KIAA1967                                             | 0.04                  | 1.84                      |
| ADXEC.23124.C1_at     | NLRP1                | NLR family pyrin domain containing 1                 | 0.04                  | 1.83                      |
| ADXECADA.21291_at     | DAPK1                | death-associated protein kinase 1                    | 0.03                  | 1.77                      |
| ADXECRS.325_s_at      | SEMA4D               | sema domain immunoglobulin domain (Ig) transmembrane | 0.03                  | 1.73                      |

|                       |         |                                                     |       |      |
|-----------------------|---------|-----------------------------------------------------|-------|------|
| ADXEC.19219.C1_s_at   | DYRK2   | dual-specificity tyrosine-(Y)-phosphorylation       | 0.04  | 1.73 |
| ADXEC.15023.C1_at     | RAF1    | v-raf-1 murine leukemia viral oncogene homolog 1    | 0.05  | 1.71 |
| ADXECAD.25947_s_at    | ATG12   | ATG12 autophagy related 12 homolog (S. cerevisiae)  | 0.01  | 1.66 |
| ADXEC.23048.C1_s_at   | ALOX12  | arachidonate 12-lipoxygenase                        | 0.01  | 1.63 |
| ADXEC.10003.C2_s_at   | YWHAZ   | tyrosine 3-monooxygenase/tryptophan 5-monooxygenase | 0.04  | 1.6  |
| ADXECAD.23765_s_at    | CDKN2D  | cyclin-dependent kinase inhibitor 2D (p19)          | 0.04  | 1.54 |
| ADXEC.18224.C1-a_s_at | CARD8   | caspase recruitment domain family member 8          | 0.02  | 1.51 |
| ADXEC.11953.C2_s_at   | APAF1   | apoptotic peptidase activating factor 1             | 0.007 | 1.51 |
| ADXEC.8646.C1-a_s_at  | SMNDC1  | survival motor neuron domain containing 1           | 0.05  | 1.50 |
| ADXEC.30362.C1_at     | GPR65   | G protein-coupled receptor 65                       | 0.05  | 1.49 |
| ADXEC.65.C1_at        | PPT1    | palmitoyl-protein thioesterase 1                    | 0.03  | 1.47 |
| ADXEC.2591.C1_s_at    | STK4    | serine/threonine kinase 4                           | 0.05  | 1.43 |
| ADXEC.1357.CB1_x_at   | YWHAZ   | tyrosine 3-monooxygenase/tryptophan 5-monooxygenase | 0.04  | 1.32 |
| ADXEC.3894.C1_at      | SH3GLB1 | SH3-domain GRB2-like endophilin B1                  | 0.02  | 1.32 |
| ADXECAD.17311_at      | PDIA2   | protein disulfide isomerase family A, member 2      | 0.02  | 1.27 |
| ADXEC.931.C1_s_at     | GPX1    | glutathione peroxidase 1                            | 0.05  | 1.26 |
| ADXECRS.13131_at      | BIRC5   | baculoviral IAP repeat-containing 5                 | 0.05  | 1.25 |
| ADXECRS.13131_x_at    | BIRC5   | baculoviral IAP repeat-containing 5                 | 0.04  | 1.22 |
| ADXEC.1357.CB2_s_at   | YWHAZ   | tyrosine 3-monooxygenase/tryptophan 5-monooxygenase | 0.01  | 1.20 |
