# Supplementary material
Source: PubMed Central journal article supplement (PMC3142463)
Supplement: cc1011_1794SD10.pdf [file cc1011_1794SD10.pdf]

**Supplemental Table 10. Intersection with Glycolysis, Hypoxia, and Oxidative Stress.**

| Probe                                                          | Symbol   | Description                                            | P-value | Fold-Change |
|----------------------------------------------------------------|----------|--------------------------------------------------------|---------|-------------|
| <b><u>Glycolysis and Mitochondrial Pyruvate Metabolism</u></b> |          |                                                        |         |             |
| ADXEC.261.CB3_s_at                                             | TPI1     | triosephosphate isomerase 1                            | 0.01    | 3.07        |
| ADXEC.9076.C1_s_at                                             | PKM2     | pyruvate kinase muscle                                 | 0.04    | 2.89        |
| ADXEC.1248.C1_at                                               | DHTKD1   | dehydrogenase E1 and transketolase domain containing 1 | 0.04    | 2.41        |
| ADXEC.3267.C1-a_s_at                                           | PRKAG2   | protein kinase AMP-activated gamma 2 non-catalytic     | 0.02    | 2.23        |
| ADXECS.39826_at                                                | PGK1     | phosphoglycerate kinase 1                              | 0.05    | 2.16        |
| ADXEC.26350.C1_at                                              | ADPGK    | ADP-dependent glucokinase                              | 0.03    | 1.92        |
| ADXECADE.22627_s_at                                            | H6PD     | hexose-6-phosphate dehydrogenase (glucose)             | 0.03    | 1.62        |
| ADXECS.8473_at                                                 | GAPDHS   | glyceraldehyde-3-phosphate dehydrogenase, sperm        | 0.002   | 1.24        |
| ADXECS.3766_s_at                                               | PDPR     | pyruvate dehydrogenase phosphatase regulatory subunit  | 0.01    | 4.15        |
| ADXEC.23135.C1-a_s_at                                          | PDPR     | pyruvate dehydrogenase phosphatase regulatory subunit  | 0.008   | 1.60        |
| ADXEC.554.C4_at                                                | IDH3B    | isocitrate dehydrogenase 3 (NAD) beta                  | 0.02    | 2.86        |
| ADXEC.1248.C1_at                                               | DHTKD1   | dehydrogenase E1 and transketolase domain containing 1 | 0.04    | 2.41        |
| ADXECS.34598_x_at                                              | PDK3     | pyruvate dehydrogenase kinase isozyme 3                | 0.03    | 1.49        |
| ADXEC.19665.C1-a_s_at                                          | NNT      | nicotinamide nucleotide transhydrogenase               | 0.05    | 1.39        |
| <b><u>Response to Hypoxia</u></b>                              |          |                                                        |         |             |
| ADXEC.18082.C1_at                                              | RYR1     | ryanodine receptor 1 (skeletal)                        | 0.004   | 2.73        |
| ADXEC.8712.C1-a_s_at                                           | CXCR4    | chemokine (C-X-C motif) receptor 4                     | 0.01    | 2.53        |
| ADXEC.8712.C1_at                                               | CXCR4    | chemokine (C-X-C motif) receptor 4                     | 0.02    | 1.60        |
| ADXEC.6937.C1_s_at                                             | SLC8A1   | solute carrier family 8 (sodium/calcium exchanger)     | 0.007   | 2.43        |
| ADXECADE.13897_at                                              | SLC8A1   | solute carrier family 8 (sodium/calcium exchanger)     | 0.02    | 1.69        |
| ADXEC.7240.C1-a_s_at                                           | ELL2     | elongation factor RNA polymerase II 2                  | 0.04    | 2.34        |
| ADXEC.1226.C2_x_at                                             | TYMS     | gene for thymidylate synthase                          | 0.02    | 2.27        |
| ADXEC.1226.C2_at                                               | TYMS     | gene for thymidylate synthase                          | 0.01    | 2.24        |
| ADXECEMUTR.7780_x_at                                           | CDC42    | cell division cycle 42 (GTP binding protein 25kDa)     | 0.03    | 2.26        |
| ADXEC.20725.C1_at                                              | CDC42    | cell division cycle 42 (GTP binding protein 25kDa)     | 0.03    | 1.81        |
| ADXECS.39826_at                                                | PGK1     | phosphoglycerate kinase 1                              | 0.05    | 2.16        |
| ADXEC.6420.C1-a_s_at                                           | ASXL1    | additional sex combs like 1 (Drosophila)               | 0.02    | 2.22        |
| ADXEC.926.C1-a_s_at                                            | TMEM106C | transmembrane protein 106C                             | 0.04    | 2.22        |
| ADXEC.926.C1_s_at                                              | TMEM106C | transmembrane protein 106C                             | 0.03    | 1.55        |
| ADXECS.6801_s_at                                               | TMEM106C | transmembrane protein 106C                             | 0.05    | 1.47        |
| ADXEC.34398.C1_x_at                                            | PPARA    | peroxisome proliferative activated receptor alpha      | 0.02    | 2.20        |
| ADXEC.2484.C1_at                                               | TMED5    | transmembrane emp24 protein transport domain           | 0.009   | 2.17        |
| ADXECADE.16644_at                                              | PEX26    | Peroxisomal biogenesis factor 26                       | 0.01    | 2.15        |
| ADXECADE.5686_x_at                                             | IL17RB   | interleukin 17 receptor B                              | 0.05    | 2.14        |
| ADXEC.17916.C1_at                                              | RAB14    | RAB14 member RAS oncogene family                       | 0.04    | 2.11        |
| ADXEC.7891.C1_at                                               | MED6     | mediator complex subunit 6                             | 0.03    | 2.05        |
| ADXEC.22249.C1_at                                              | MED6     | mediator complex subunit 6                             | 0.02    | 1.73        |
| ADXEC.22249.C1_x_at                                            | MED6     | mediator complex subunit 6                             | 0.02    | 1.67        |

|                      |         |                                                                       |        |      |
|----------------------|---------|-----------------------------------------------------------------------|--------|------|
| ADXEC.111.C71_at     | EEF1A1  | Human elongation factor EF-1-alpha                                    | 0.05   | 2.04 |
| ADXEC.32742.C1_s_at  | NDRG1   | N-myc downstream regulated 1                                          | 0.04   | 1.97 |
| ADXEC.31875.C1_at    | FAM22A  | family with sequence similarity 22 member A                           | 0.04   | 1.96 |
| ADXEC.6304.C1_at     | ECE1    | endothelin converting enzyme 1                                        | 0.01   | 1.89 |
| ADXECRS.33044_s_at   | H2AFV   | H2A histone family member V                                           | 0.05   | 1.89 |
| ADXECAD.13671_x_at   | MXD4    | MAX dimerization protein 4                                            | 0.03   | 1.88 |
| ADXEC.399.C22_x_at   | LRP1    | low density lipoprotein receptor-related protein 1                    | 0.02   | 1.85 |
| ADXEC.4862.C4_s_at   | C1orf77 | chromosome 1 open reading frame 77                                    | 0.0004 | 1.83 |
| ADXECAD.22713_s_at   | GAB1    | GRB2-associated binding protein 1                                     | 0.04   | 1.82 |
| ADXEC.4634.C3_at     | ID2     | inhibitor of DNA binding 2 dominant negative helix-loop-helix protein | 0.05   | 1.76 |
| ADXECAD.20490_s_at   | ID2     | inhibitor of DNA binding 2 dominant negative                          | 0.05   | 1.61 |
| ADXEC.11842.C1_at    | SERTAD2 | SERTA domain containing 2                                             | 0.03   | 1.75 |
| ADXECRS.5993_at      | PPAT    | phosphoribosyl pyrophosphate amidotransferase                         | 0.05   | 1.74 |
| ADXEC.19219.C1_s_at  | DYRK2   | dual-specificity tyrosine-(Y)-phosphorylation                         | 0.04   | 1.73 |
| ADXECADA.24681_s_at  | SSBP3   | single stranded DNA binding protein 3                                 | 0.02   | 1.70 |
| ADXECADA.634_s_at    | PGPEP1  | pyroglutamyl-peptidase I                                              | 0.03   | 1.69 |
| ADXECAD.11135_at     | SFRS3   | splicing factor arginine/serine-rich 3                                | 0.02   | 1.69 |
| ADXEC.14372.C2_s_at  | WEE1    | WEE1 homolog (S. pombe) (WEE1)                                        | 0.05   | 1.69 |
| ADXEC.2954.C1_at     | SERP1   | stress-associated endoplasmic reticulum protein 1                     | 0.008  | 1.68 |
| ADXEC.2424.C1_s_at   | SERP1   | stress-associated endoplasmic reticulum protein 1                     | 0.01   | 1.32 |
| ADXEC.39.C1_s_at     | LMNB1   | lamin B1                                                              | 0.03   | 1.66 |
| ADXECADA.20454_at    | RFX3    | regulatory factor X 3                                                 | 0.04   | 1.65 |
| ADXEC.760.C2_at      | CEP250  | centrosomal protein 250kDa                                            | 0.02   | 1.65 |
| ADXEC.760.C2_s_at    | CEP250  | centrosomal protein 250kDa                                            | 0.01   | 1.62 |
| ADXEC.703.C2_s_at    | RAD23A  | RAD23 homolog A (S. cerevisiae)                                       | 0.02   | 1.63 |
| ADXEC.8507.C1-a_s_at | SERINC3 | serine incorporator 3                                                 | 0.04   | 1.62 |
| ADXECAD.14311_at     | UFM1    | ubiquitin-fold modifier 1                                             | 0.008  | 1.61 |
| ADXEC.10003.C2_s_at  | YWHAZ   | tyrosine 3-monooxygenase/tryptophan 5-monooxygenase                   | 0.04   | 1.60 |
| ADXEC.23157.C1_s_at  | GNAI3   | G protein alpha inhibiting activity polypeptide                       | 0.03   | 1.60 |
| ADXEC.2744.C2_s_at   | CTTN    | cortactin                                                             | 0.05   | 1.53 |
| ADXECNTDJ.3602_at    | DCBLD2  | discoidin CUB and LCCL domain containing 2                            | 0.01   | 1.53 |
| ADXECAD.19136_x_at   | ERO1L   | ERO1-like (S. cerevisiae)                                             | 0.04   | 1.47 |
| ADXEC.2591.C1_s_at   | STK4    | serine/threonine kinase 4                                             | 0.05   | 1.43 |
| ADXEC.83.C1-a_s_at   | TMEM30A | transmembrane protein 30A                                             | 0.05   | 1.42 |
| ADXECAD.20345_s_at   | RAD23B  | RAD23 homolog B (S. cerevisiae)                                       | 0.007  | 1.42 |
| ADXEC.1119.C2_s_at   | HMGB2   | high-mobility group box 2                                             | 0.05   | 1.40 |
| ADXECAD.1588_x_at    | LITAF   | Pig7                                                                  | 0.01   | 1.39 |
| ADXEC.1357.CB1_x_at  | YWHAZ   | tyrosine 3-monooxygenase/tryptophan 5-monooxygenase                   | 0.04   | 1.32 |
| ADXECAD.17311_at     | PDIA2   | protein disulfide isomerase family A, member 2                        | 0.02   | 1.27 |
| ADXEC.319.C15_s_at   | EIF2S2  | eukaryotic translation initiation factor 2 subunit 2                  | 0.05   | 1.27 |
| ADXEC.9567.C3_at     | FAM96B  | Family with sequence similarity 96 member B                           | 0.04   | 1.26 |
| ADXEC.1357.CB2_s_at  | YWHAZ   | tyrosine 3-monooxygenase/tryptophan 5-monooxygenase                   | 0.01   | 1.20 |

#### **Cell Redox Homeostasis and the Response to Stress**

|                     |         |                                                           |       |      |
|---------------------|---------|-----------------------------------------------------------|-------|------|
| ADXEC.16346.C1_at   | DNAJC5  | Homo sapiens mRNA for FLJ00095 protein.                   | 0.005 | 3.83 |
| ADXECNTDJ.7311_s_at | HSPBAP1 | Homo sapiens HSPB (heat shock 27kDa) associated protein 1 | 0.02  | 2.62 |

|                      |           |                                                        |       |      |
|----------------------|-----------|--------------------------------------------------------|-------|------|
| ADXEC.989.C2_at      | BTG1      | B-cell translocation gene 1 anti-proliferative         | 0.02  | 2.54 |
| ADXECADA.18434_at    | GPX2      | glutathione peroxidase 2 (gastrointestinal)            | 0.02  | 2.50 |
| ADXECAD.24402_s_at   | SELT      | selenoprotein T (SELT) mRNA.                           | 0.05  | 2.11 |
| ADXEC.7491.C1_at     | DNAJC9    | DnaJ (Hsp40) homolog subfamily C member 9              | 0.05  | 2.05 |
| ADXEC.23874.C1_s_at  | ERP44     | endoplasmic reticulum protein 44                       | 0.01  | 1.93 |
| ADXEC.5920.C1_s_at   | SH3BGL3   | SH3 domain binding glutamic acid-rich protein like 3   | 0.02  | 1.82 |
| ADXECAD.22145_s_at   | GSR       | glutathione reductase                                  | 0.04  | 1.79 |
| ADXEC.14337.C2_at    | PPP1R15B  | protein phosphatase 1 regulatory (inhibitor) subunit   | 0.01  | 1.73 |
| ADXEC.21098.C1_at    | HSPA5     | heat shock 70kDa protein 5 (glucose-regulated protein) | 0.02  | 1.68 |
| ADXEC.6317.C1_at     | TMX4      | thioredoxin-related transmembrane protein 4            | 0.02  | 1.59 |
| ADXEC.2401.C5-a_s_at | CDC37     | cell division cycle 37 homolog (S. cerevisiae)         | 0.05  | 1.52 |
| ADXEC.971.C3-a_s_at  | EIF2AK1   | eukaryotic translation initiation factor 2-alpha       | 0.008 | 1.52 |
| ADXEC.7491.C1_x_at   | DNAJC9    | DnaJ (Hsp40) homolog subfamily C member 9              | 0.05  | 1.48 |
| ADXECRS.21396_at     | HSP90AB2P | heat shock protein 90kDa alpha (cytosolic) class B     | 0.008 | 1.41 |
| ADXEC.5198.C2_s_at   | HSPA4     | heat shock 70kDa protein 4                             | 0.04  | 1.40 |
| ADXEC.2402.C2-a_s_at | SYVN1     | synovial apoptosis inhibitor 1 synoviolin              | 0.05  | 1.35 |
| ADXEC.931.C1_s_at    | GPX1      | glutathione peroxidase 1                               | 0.05  | 1.26 |

---
