# Supplementary material
Source: PubMed Central journal article supplement (PMC3142463)
Supplement: cc1011_1794SD11.pdf [file cc1011_1794SD11.pdf]

**Supplemental Table 11 . Intersection with Genes Upregulated During DNA Damage and Repair.**

| <u>Probe</u>         | <u>Symbol</u> | <u>Description</u>                                            | <u>P-value</u> | <u>Fold-Change</u> |
|----------------------|---------------|---------------------------------------------------------------|----------------|--------------------|
| ADXEC.31458.C1_at    | POLN          | polymerase (DNA directed) nu                                  | 0.02           | 4.91               |
| ADXEC.31458.C1_x_at  | POLN          | polymerase (DNA directed) nu                                  | 0.03           | 3.63               |
| ADXECNTDJ.3576_s_at  | VCP           | valosin-containing protein                                    | 0.01           | 3.24               |
| ADXEC.31324.C1_at    | MSH6          | mutS homolog 6 (E. coli)                                      | 0.007          | 3.17               |
| ADXEC.652.C3-a_s_at  | RFC5          | replication factor C (activator 1) 5 36.5kDa                  | 0.002          | 3.03               |
| ADXECADA.11237_at    | PPP2R5C       | PP2A B56 gamma gene                                           | 0.02           | 3.00               |
| ADXEC.32186.C1_at    | H2AFX         | H2A histone family member X                                   | 0.006          | 2.88               |
| ADXEC.554.C4_at      | IDH3B         | isocitrate dehydrogenase 3 (NAD) beta                         | 0.02           | 2.86               |
| ADXECADA.18168_at    | CHAF1A        | SH3-containing protein EEN and chromatin assemblyfactor-I p15 | 0.01           | 2.75               |
| ADXEC.2392.C9_x_at   | CHAF1A        | SH3-containing protein EEN and chromatin assemblyfactor-I p15 | 0.04           | 2.02               |
| ADXECAD.16653_s_at   | BAZ1B         | bromodomain adjacent to zinc finger domain 1B                 | 0.02           | 2.73               |
| ADXEC.27079.C1_at    | RAD1          | RAD1 homolog (S. pombe)                                       | 0.01           | 2.63               |
| ADXEC.35016.C1_at    | FANCC         | Fanconi anemia complementation group C                        | 0.003          | 2.55               |
| ADXEC.488.C4_s_at    | THOP1         | thimet oligopeptidase 1                                       | 0.04           | 2.54               |
| ADXEC.7744.C3_s_at   | APITD1        | apoptosis-inducing TAF9-like domain 1 (APITD1)                | 0.002          | 2.38               |
| ADXEC.32186.C1_x_at  | H2AFX         | H2A histone family member X                                   | 0.02           | 2.36               |
| ADXECRS.43632_s_at   | WHSC1         | Wolf-Hirschhorn syndrome candidate 1                          | 0.006          | 2.32               |
| ADXEC.1226.C2_x_at   | TYMS          | gene for thymidylate synthase                                 | 0.02           | 2.27               |
| ADXEC.1226.C2_at     | TYMS          | gene for thymidylate synthase                                 | 0.01           | 2.24               |
| ADXEC.20945.C1_at    | BARD1         | BRCA1 associated RING domain 1                                | 0.03           | 2.24               |
| ADXEC.34337.C1_at    | XRCC3         | XRCC3 DNA repair gene                                         | 0.05           | 2.16               |
| ADXECAD.9122_s_at    | XRCC3         | XRCC3 DNA repair gene                                         | 0.04           | 1.95               |
| ADXEC.6968.C1_at     | APEX2         | APEX nuclease (apurinic/aprimidinic endonuclease) 2           | 0.0007         | 2.13               |
| ADXEC.2250.C1_at     | PSMB7         | proteasome (prosome macropain) subunit beta type 7            | 0.01           | 2.11               |
| ADXECAD.16766_x_at   | MRPL9         | mitochondrial ribosomal protein L9                            | 0.003          | 2.11               |
| ADXECAD.16766_at     | MRPL9         | mitochondrial ribosomal protein L9                            | 0.005          | 1.87               |
| ADXEC.7491.C1_at     | DNAJC9        | DnaJ (Hsp40) homolog subfamily C member 9                     | 0.05           | 2.05               |
| ADXEC.7491.C1_x_at   | DNAJC9        | DnaJ (Hsp40) homolog subfamily C member 9                     | 0.05           | 1.48               |
| ADXECAD.23427_s_at   | ATRX          | alpha thalassemia/mental retardation syndrome X-linked        | 0.01           | 2.01               |
| ADXEC.14089.C2_at    | DIAPH1        | diaphanous homolog 1 (Drosophila)                             | 0.02           | 1.99               |
| ADXEC.4049.C6_at     | KHSRP         | KH type splicing regulatory protein                           | 0.04           | 1.93               |
| ADXEC.4619.C1-a_s_at | FANCA         | Fanconi anemia complementation group A                        | 0.04           | 1.90               |

|                       |        |                                                             |        |      |
|-----------------------|--------|-------------------------------------------------------------|--------|------|
| ADXECRS.33044_s_at    | H2AFV  | H2A histone family member V                                 | 0.05   | 1.89 |
| ADXEC.224.C27_at      | MDC1   | mediator of DNA-damage checkpoint 1                         | 0.01   | 1.84 |
| ADXEC.224.C27_x_at    | MDC1   | mediator of DNA-damage checkpoint 1                         | 0.03   | 1.79 |
| ADXEC.4541.C1_s_at    | TNPO3  | transportin 3                                               | 0.0002 | 1.81 |
| ADXEC.3547.C2-a_s_at  | PARP1  | poly (ADP-ribose) polymerase 1                              | 0.02   | 1.73 |
| ADXECAD.16674_at      | ESCO1  | establishment of cohesion 1 homolog 1 (S. cerevisiae)       | 0.04   | 1.72 |
| ADXEC.1048.C1_x_at    | POLE3  | polymerase (DNA directed) epsilon 3 (p17 subunit)           | 0.02   | 1.72 |
| ADXEC.2954.C1_at      | SERP1  | stress-associated endoplasmic reticulum protein 1           | 0.008  | 1.68 |
| ADXECAD.6357_at       | TTC5   | tetratricopeptide repeat domain 5                           | 0.03   | 1.65 |
| ADXECRS.19560_s_at    | BZW1   | basic leucine zipper and W2 domains 1                       | 0.02   | 1.64 |
| ADXEC.703.C2_s_at     | RAD23A | RAD23 homolog A (S. cerevisiae)                             | 0.02   | 1.63 |
| ADXEC.1324.C1_s_at    | UBAP2L | ubiquitin associated protein 2-like                         | 0.05   | 1.62 |
| ADXEC.1.C3_s_at       | DNMT1  | DNA (cytosine-5-)-methyltransferase 1                       | 0.006  | 1.60 |
| ADXEC.1690.C5_s_at    | GNB1   | guanine nucleotide binding protein (G protein) beta         | 0.002  | 1.56 |
| ADXECRS.4234_s_at     | CAP1   | CAP adenylate cyclase-associated protein 1 (yeast)          | 0.03   | 1.56 |
| ADXEC.633.C1_x_at     | WDR1   | WD repeat domain 1                                          | 0.008  | 1.56 |
| ADXECADA.18698_s_at   | WDR1   | WD repeat domain 1                                          | 0.03   | 1.49 |
| ADXEC.13729.C1_s_at   | DHX38  | DEAH (Asp-Glu-Ala-His) box polypeptide 38                   | 0.04   | 1.55 |
| ADXECADA.13461_at     | PPIE   | Peptidylprolyl isomerase E (cyclophilin E)                  | 0.03   | 1.53 |
| ADXEC.8260.C2_s_at    | CSNK1D | casein kinase 1 delta                                       | 0.05   | 1.52 |
| ADXEC.719.C1_s_at     | LMNB2  | lamin B2                                                    | 0.03   | 1.52 |
| ADXEC.1114.C2-a_s_at  | CAPZA1 | capping protein (actin filament) muscle Z-line alpha        | 0.02   | 1.52 |
| ADXEC.2206.C2_at      | NDUFC1 | NADH dehydrogenase (ubiquinone) 1 subcomplex unknown 1 6kDa | 0.03   | 1.52 |
| ADXEC.633.C1_at       | WDR1   | WD repeat domain 1                                          | 0.01   | 1.51 |
| ADXEC.2291.C1_x_at    | NDUFV2 | NDUFV2 gene for 24-kDa subunit of complex I                 | 0.02   | 1.51 |
| ADXEC.8646.C1-a_s_at  | SMNDC1 | survival motor neuron domain containing 1                   | 0.05   | 1.50 |
| 200041_s_at           | BAT1   | HLA-B associated transcript 1                               | 0.02   | 1.48 |
| ADXEC.7122.C1_at      | AFG3L2 | AFG3 ATPase family gene 3-like 2 (yeast)                    | 0.02   | 1.47 |
| ADXEC.65.C1_at        | PPT1   | palmitoyl-protein thioesterase 1                            | 0.03   | 1.47 |
| ADXECAD.20345_s_at    | RAD23B | RAD23 homolog B                                             | 0.007  | 1.42 |
| ADXOCEC.9935.C1_x_at  | RAD9A  | RAD9 homolog A (S. pombe)                                   | 0.05   | 1.38 |
| ADXEC.22883.C2-a_s_at | G3BP2  | GTPase activating protein (SH3 domain) binding protein      | 0.05   | 1.37 |
| ADXEC.2424.C1_s_at    | SERP1  | stress-associated endoplasmic reticulum protein 1           | 0.01   | 1.32 |
| ADXECNTDJ.6223_s_at   | IFRD1  | interferon-related developmental regulator 1                | 0.02   | 1.28 |
| ADXEC.319.C15_s_at    | EIF2S2 | eukaryotic translation initiation factor 2 subunit 2        | 0.05   | 1.27 |
