# Supplementary material
Source: PubMed Central journal article supplement (PMC3142463)
Supplement: cc1011_1794SD12.pdf [file cc1011_1794SD12.pdf]

**Supplemental Table 12. Intersection with Mitochondrial Associated Proteins.**

| <b>Probe</b>          | <b>Symbol</b> | <b>Description</b>                                     | <b>P-value</b> | <b>Fold-Change</b> |
|-----------------------|---------------|--------------------------------------------------------|----------------|--------------------|
| ADXECAD.7889_at       | GATM          | glycine amidinotransferase (L-arginine:glycine)        | 0.02           | 2.86               |
| ADXECRS.12931_at      | PPM1K         | protein phosphatase Mg <sup>2+</sup> -dependent 1K     | 0.03           | 2.77               |
| ADXECAD.18269_s_at    | PPM1K         | protein phosphatase Mg <sup>2+</sup> -dependent 1K     | 0.03           | 2.44               |
| ADXECAD.10111_s_at    | BCAT1         | branched chain amino-acid transaminase 1 cytosolic     | 0.003          | 2.63               |
| ADXEC.20400.C1_s_at   | POLG2         | polymerase (DNA directed) gamma 2 accessory subunit    | 0.003          | 2.60               |
| ADXEC.21936.C1-a_s_at | DCAKD         | dephospho-CoA kinase domain containing                 | 0.02           | 2.59               |
| ADXEC.6333.C1_at      | RPUSD4        | RNA pseudouridylate synthase domain containing 4       | 0.001          | 2.53               |
| ADXECEMUTR.278_s_at   | SLC25A37      | solute carrier family 25 member 37 (SLC25A37)          | 0.03           | 2.51               |
| ADXECEMUTR.7992_at    | CISD2         | CDGSH iron sulfur domain 2                             | 0.04           | 2.50               |
| ADXEC.22509.C1_at     | OAS2          | 2'-5'-oligoadenylate synthetase 2, 69/71kDa            | 0.04           | 2.50               |
| ADXEC.12297.C1_s_at   | HSD17B8       | hydroxysteroid (17-beta) dehydrogenase 8               | 0.05           | 2.45               |
| ADXECNTDJ.2810_at     | PET112L       | PET112-like (yeast)                                    | 0.02           | 2.44               |
| ADXECAD.18269_s_at    | PPM1K         | protein phosphatase Mg <sup>2+</sup> -dependent 1K     | 0.03           | 2.44               |
| ADXEC.12118.C1_s_at   | BCL2L13       | BCL2-like 13 (apoptosis facilitator)                   | 0.04           | 2.44               |
| ADXEC.1248.C1_at      | DHTKD1        | dehydrogenase E1 and transketolase domain containing 1 | 0.04           | 2.41               |
| ADXEC.21693.C1_s_at   | PCCA          | propionyl CoA carboxylase, alpha polypeptide           | 0.02           | 2.42               |
| ADXECADA.9979_at      | VAMP1         | vesicle-associated membrane protein 1 (synaptobrevin)  | 0.02           | 2.35               |
| ADXECEMG.11_at        | ND4L          | mitochondrially encoded NADH dehydrogenase 4L          | 0.05           | 2.35               |
| ADXEC.20111.C1_x_at   | SFXN1         | sideroflexin 1                                         | 0.03           | 2.15               |
| ADXECAD.16766_x_at    | MRPL9         | mitochondrial ribosomal protein L9                     | 0.003          | 2.11               |
| ADXECAD.16766_at      | MRPL9         | mitochondrial ribosomal protein L9                     | 0.005          | 1.87               |
| ADXECADA.20527_s_at   | ABCF2         | ATP-binding cassette sub-family F (GCN20) member 2     | 0.01           | 1.96               |
| ADXEC.3840.C1_at      | MFN1          | mitofusin 1                                            | 0.03           | 1.92               |
| ADXEC.3284.C1_s_at    | SARS2         | seryl-tRNA synthetase 2 mitochondrial                  | 0.04           | 1.90               |
| ADXECNTDJ.5584_at     | ADAP2         | ArfGAP with dual PH domains 2                          | 0.007          | 1.86               |
| ADXECNTDJ.780_s_at    | MRPL49        | mitochondrial ribosomal protein L49                    | 0.04           | 1.84               |
| ADXEC.26121.C2_s_at   | ACSM3         | acyl-CoA synthetase medium-chain family member 3       | 0.05           | 1.83               |
| ADXEC.11553.C1_s_at   | SLC25A14      | solute carrier family 25 (mitochondrial carrier)       | 0.05           | 1.77               |
| ADXECADA.20237_at     | FEZ1          | fasciculation and elongation protein zeta 1 (zygin I)  | 0.02           | 1.74               |
| ADXEC.20290.C1_at     | OXNAD1        | oxidoreductase NAD-binding domain containing 1         | 0.05           | 1.74               |
| ADXEC.2514.C1_at      | SQRDL         | sulfide quinone reductase-like (yeast)                 | 0.03           | 1.73               |
| ADXEC.12026.C2_at     | C20orf7       | chromosome 20 open reading frame 7                     | 0.008          | 1.65               |
| ADXEC.182.C1-a_s_at   | SIRT5         | sirtuin 5                                              | 0.03           | 1.60               |
| ADXEC.2886.C2-a_s_at  | GOLPH3        | golgi phosphoprotein 3 (coat-protein)                  | 0.02           | 1.55               |
| ADXEC.2886.C1_at      | GOLPH3        | golgi phosphoprotein 3 (coat-protein)                  | 0.05           | 1.26               |
| ADXEC.2206.C2_at      | NDUFC1        | NADH dehydrogenase (ubiquinone) 1 subcomplex           | 0.03           | 1.52               |
| ADXEC.2291.C1_x_at    | NDUFV2        | NDUFV2 gene for 24-kDa subunit of complex I            | 0.02           | 1.51               |
| ADXECRS.10528_s_at    | MRPS7         | mitochondrial ribosomal protein S7                     | 0.05           | 1.48               |
| ADXECNTDJ.835_at      | DNAJA3        | DnaJ (Hsp40) homolog subfamily A member 3              | 0.05           | 1.39               |
| ADXEC.3599.C1_s_at    | TYMP          | thymidine phosphorylase                                | 0.05           | 1.37               |
| ADXEC.3578.C2_x_at    | ND6           | mitochondrially encoded NADH dehydrogenase 6           | 0.05           | 1.24               |
