# Supplementary material
Source: PubMed Central journal article supplement (PMC3142463)
Supplement: cc1011_1794SD13.pdf [file cc1011_1794SD13.pdf]

**Supplemental Table 13. Intersection with Neural Stem Cell Associated Genes.**

| <b><u>Probe</u></b>  | <b><u>Symbol</u></b> | <b><u>Description</u></b>                                            | <b><u>P-value</u></b> | <b><u>Fold-Change</u></b> |
|----------------------|----------------------|----------------------------------------------------------------------|-----------------------|---------------------------|
| ADXEC.31458.C1_at    | POLN                 | polymerase (DNA directed) nu (POLN) gene complete cds.               | 0.0244                | 4.91                      |
| ADXEC.31458.C1_x_at  | POLN                 | polymerase (DNA directed) nu (POLN) gene complete cds.               | 0.0268                | 3.63                      |
| ADXEC.7503.C1_s_at   | DPP3                 | dipeptidyl-peptidase 3 (DPP3) transcript variant 1                   | 0.0214                | 3.50                      |
| ADXEC.4766.C1-a_s_at | LAS1L                | LAS1-like (S. cerevisiae) (LAS1L) transcript variant                 | 0.0233                | 3.37                      |
| ADXECNTDJ.3576_s_at  | VCP                  | valosin-containing protein (VCP) mRNA.                               | 0.0118                | 3.24                      |
| ADXEC.652.C3-a_s_at  | RFC5                 | replication factor C (activator 1) 5 36.5kDa (RFC5)                  | 0.0022                | 3.03                      |
| ADXEC.5487.C2_s_at   | PNKD                 | paroxysmal nonkinesigenic dyskinesia (PNKD) nuclear                  | 0.05                  | 3.01                      |
| ADXEC.34747.C1_s_at  | SRR                  | Serine racemase                                                      | 0.0247                | 2.91                      |
| ADXEC.9076.C1_s_at   | PKM2                 | pyruvate kinase muscle (PKM2) gene complete cds.                     | 0.0431                | 2.89                      |
| ADXECAD.7889_at      | GATM                 | glycine amidinotransferase (L-arginine:glycine                       | 0.0227                | 2.86                      |
| ADXEC.23283.C1_s_at  | EZH2                 | enhancer of zeste homolog 2 (Drosophila) (EZH2)                      | 0.0213                | 2.77                      |
| ADXECADA.18168_at    | CHAF1A               | SH3-containing protein EEN (EEN) and chromatin assemblyfactor-I p15  | 0.0114                | 2.75                      |
| ADXEC.1467.C1_at     | UTP18                | UTP18 small subunit (SSU) processome component homolog (yeast)       | 0.0421                | 2.71                      |
| ADXEC.16051.C2_s_at  | PTPRJ                | protein tyrosine phosphatase receptor type J                         | 0.02                  | 2.64                      |
| ADXEC.27079.C1_at    | RAD1                 | RAD1 homolog (S. pombe) (RAD1) transcript variant 1                  | 0.0102                | 2.63                      |
| ADXEC.6850.C1-a_s_at | DNAJB6               | DnaJ (Hsp40) homolog subfamily B member 6 (DNAJB6)                   | 0.0423                | 2.63                      |
| ADXPCEC.11099.C1_at  | GSPT1                | Human chromosome 16p13.1 BAC clone CIT987SK-551G9 complete sequence. | 0.0034                | 2.62                      |
| ADXECADA.18979_s_at  | USP38                | ubiquitin specific peptidase 38 (USP38) mRNA.                        | 0.05                  | 2.58                      |
| ADXEC.6333.C1_at     | RPUSD4               | RNA pseudouridylate synthase domain containing 4                     | 0.0012                | 2.53                      |
| ADXEC.14462.C1_at    | PCYT1A               | phosphate cytidyltransferase 1 choline alpha                         | 0.05                  | 2.48                      |
| ADXEC.12118.C1_s_at  | BCL2L13              | BCL2-like 13 (apoptosis facilitator) (BCL2L13)                       | 0.0417                | 2.44                      |
| ADXEC.6876.C1_at     | SRPRB                | signal recognition particle receptor B subunit                       | 0.05                  | 2.42                      |
| ADXEC.12903.C1_s_at  | TRIP6                | thyroid hormone receptor interactor 6 (TRIP6) mRNA.                  | 0.0047                | 2.38                      |
| ADXECNTDJ.3859_at    | TMEM165              | Transmembrane protein 165                                            | 0.0097                | 2.37                      |
| ADXECAD.7010_at      | PARL                 | presenilin associated rhomboid-like (PARL) nuclear                   | 0.05                  | 2.35                      |
| ADXECNTDJ.3106_at    | TNC                  | tenascin C (TNC) mRNA.                                               | 0.05                  | 2.35                      |
| ADXEC.14462.C1_x_at  | PCYT1A               | phosphate cytidyltransferase 1 choline alpha                         | 0.0416                | 2.34                      |
| ADXEC.6557.C2_s_at   | HTATIP2              | HIV-1 Tat interactive protein 2 30kDa (HTATIP2)                      | 0.0231                | 2.33                      |
| ADXECAD.12804_x_at   | PTPN1                | Protein tyrosine phosphatase non-receptor type 1                     | 0.0279                | 2.33                      |
| ADXEC.487.C1-a_s_at  | RNF14                | ring finger protein 14 (RNF14) transcript variant 2                  | 0.0152                | 2.3                       |

|                       |           |                                                                           |        |      |
|-----------------------|-----------|---------------------------------------------------------------------------|--------|------|
| ADXECNTDJ.1237_at     | KPNA1     | karyopherin alpha 1 (importin alpha 5) (KPNA1)                            | 0.05   | 2.28 |
| ADXEC.10647.C1-a_s_at | ZNF644    | zinc finger protein 644 (ZNF644) transcript variant                       | 0.0355 | 2.28 |
| ADXEC.1226.C2_x_at    | TYMS      | gene for thymidylate synthase complete cds.                               | 0.017  | 2.27 |
| ADXEC.5973.C1_at      | RMI1      | RMI1 RecQ mediated genome instability 1 homolog (S.                       | 0.05   | 2.24 |
| ADXEC.1226.C2_at      | TYMS      | gene for thymidylate synthase complete cds.                               | 0.0134 | 2.24 |
| ADXECAD.17716_x_at    | PTPN1     | Protein tyrosine phosphatase non-receptor type 1                          | 0.0087 | 2.21 |
| Adx-200054-up_s_at    | ZNF259    | zinc finger protein 259 (ZNF259) mRNA.                                    | 0.0413 | 2.21 |
| ADXEC.15673.C1_s_at   | RAB8B     | RAB8B member RAS oncogene family (RAB8B) mRNA.                            | 0.0389 | 2.19 |
| ADXEC.4103.C1_at      | CSNK2A2   | casein kinase 2 alpha prime polypeptide (CSNK2A2)                         | 0.0122 | 2.19 |
| ADXECAD.28846_s_at    | CASP2     | caspase 2 apoptosis-related cysteine peptidase                            | 0.0117 | 2.19 |
| ADXECRS.39826_at      | PGK1      | phosphoglycerate kinase 1 (PGK1) mRNA.                                    | 0.05   | 2.16 |
| ADXEC.20111.C1_x_at   | SFXN1     | sideroflexin 1 (SFXN1) mRNA.                                              | 0.0338 | 2.15 |
| ADXECRS.6440_s_at     | STRBP     | spermatid perinuclear RNA binding protein (STRBP)                         | 0.0132 | 2.14 |
| ADXEC.24458.C1-a_s_at | DTYMK     | Deoxythymidylate kinase (thymidylate kinase)                              | 0.0154 | 2.12 |
| ADXECAD.16766_x_at    | MRPL9     | mitochondrial ribosomal protein L9 (MRPL9) nuclear                        | 0.0034 | 2.11 |
| ADXECAD.24402_s_at    | SELT      | selenoprotein T (SELT) mRNA.                                              | 0.05   | 2.11 |
| ADXECNTDJ.2671_at     | KCNAB3    | potassium voltage-gated channel shaker-related subfamily<br>beta member 3 | 0.05   | 2.11 |
| ADXECNTDJ.6300_at     | AP1G1     | adaptor-related protein complex 1 gamma 1 subunit                         | 0.029  | 2.10 |
| ADXEC.12903.C3_s_at   | TRIP6     | thyroid hormone receptor interactor 6 (TRIP6) mRNA.                       | 0.0138 | 2.09 |
| ADXECRS.27012_at      | STX7      | syntaxin 7 (STX7) mRNA.                                                   | 0.0073 | 2.07 |
| ADXEC.28173.C1-a_s_at | C14orf106 | chromosome 14 open reading frame 106 (C14orf106)                          | 0.0089 | 2.05 |
| ADXECAD.1657_at       | SAE1      | SUMO1 activating enzyme subunit 1 (SAE1) transcript                       | 0.0375 | 2.05 |
| ADXEC.7491.C1_at      | DNAJC9    | DnaJ (Hsp40) homolog subfamily C member 9                                 | 0.05   | 2.05 |
| ADXEC.2392.C9_x_at    | CHAF1A    | SH3-containing protein EEN (EEN) and chromatin<br>assemblyfactor-I p15    | 0.05   | 2.02 |
| ADXECAD.20979_s_at    | ADAM10    | ADAM metallopeptidase domain 10 (ADAM10) mRNA.                            | 0.0011 | 2.00 |
| ADXEC.11266.C1_at     | PELI1     | Pellino homolog 1 (Drosophila)                                            | 0.0226 | 1.99 |
| ADXEC.111.C99_s_at    | USP22     | ubiquitin specific peptidase 22 (USP22) mRNA.                             | 0.04   | 1.98 |
| ADXECAD.11485_s_at    | RANBP9    | RAN binding protein 9 (RANBP9) mRNA.                                      | 0.0053 | 1.98 |
| ADXEC.2920.C1_at      | CHD7      | Chromodomain helicase DNA binding protein 7                               | 0.05   | 1.97 |
| ADXECAD.17716_at      | PTPN1     | Protein tyrosine phosphatase non-receptor type 1                          | 0.0163 | 1.97 |
| ADXECNTDJ.1492_at     | TAF15     | TAF15 RNA polymerase II TATA box binding protein(TBP)-<br>associated fa   | 0.05   | 1.96 |
| ADXECADA.20527_s_at   | ABCF2     | ATP-binding cassette sub-family F (GCN20) member 2                        | 0.0135 | 1.96 |
| ADXECRS.13593_at      | PDAP1     | PDGFA associated protein 1 (PDAP1) mRNA.                                  | 0.038  | 1.93 |
| ADXECAD.26276_s_at    | GNA13     | guanine nucleotide binding protein (G protein) alpha                      | 0.0102 | 1.92 |

|                       |          |                                                                                                                                |        |      |
|-----------------------|----------|--------------------------------------------------------------------------------------------------------------------------------|--------|------|
| ADXEC.3840.C1_at      | MFN1     | mitofusin 1 (MFN1) nuclear gene encoding                                                                                       | 0.028  | 1.92 |
| ADXEC.33954.C1_at     | TBRG4    | mRNA for KIAA0948 protein partial cds.                                                                                         | 0.0221 | 1.92 |
| ADXECAD.18989_at      | CHD7     | chromodomain helicase DNA binding protein 7 (CHD7)                                                                             | 0.0346 | 1.92 |
| ADXEC.9451.C1_s_at    | BCL2L13  | BCL2-like 13 (apoptosis facilitator) (BCL2L13)                                                                                 | 0.0005 | 1.90 |
| ADXEC.11501.C1_s_at   | NUP93    | nucleoporin 93kDa (NUP93) mRNA.                                                                                                | 0.0166 | 1.89 |
| ADXECADA.22882_s_at   | PDCD2    | programmed cell death 2 (PDCD2) transcript variant 1                                                                           | 0.0375 | 1.89 |
| ADXEC.1909.C1_at      | ETF1     | eukaryotic translation termination factor 1 (ETF1)                                                                             | 0.0027 | 1.88 |
| ADXECAD.19332_s_at    | CFL2     | cofilin 2 (muscle) (CFL2) transcript variant 1 mRNA.                                                                           | 0.052  | 1.88 |
| ADXECNTDJ.4966_s_at   | SPATA5   | spermatogenesis associated 5 (SPATA5) mRNA.                                                                                    | 0.0411 | 1.88 |
| ADXPCEC.11965.C1_at   | TMEM165  | Transmembrane protein 165                                                                                                      | 0.0092 | 1.87 |
| ADXECAD.16766_at      | MRPL9    | mitochondrial ribosomal protein L9 (MRPL9) nuclear                                                                             | 0.0051 | 1.87 |
| ADXEC.16224.C1_at     | SCPEP1   | Serine carboxypeptidase 1                                                                                                      | 0.0347 | 1.87 |
| ADXEC.3279.C1-a_s_at  | ARID1A   | AT rich interactive domain 1A (SWI-like) (ARID1A)                                                                              | 0.0213 | 1.86 |
| ADXEC.16104.C2_s_at   | NUBP1    | nucleotide binding protein 1 (MinD homolog E. coli)                                                                            | 0.0384 | 1.84 |
| ADXECNTDJ.5398_s_at   | DUSP16   | Dual specificity phosphatase 16                                                                                                | 0.05   | 1.83 |
| ADXECRS.8012_at       | DGAT1    | diacylglycerol O-acyltransferase homolog 1 (mouse) mRNA<br>(cDNAclone)                                                         | 0.0424 | 1.82 |
| ADXECAD.22713_s_at    | GAB1     | GRB2-associated binding protein 1 (GAB1) transcript                                                                            | 0.0427 | 1.82 |
| ADXEC.3751.C2_at      | TBC1D1   | TBC1 (tre-2/USP6 BUB2 cdc16) domain family member 1                                                                            | 0.0157 | 1.81 |
| ADXEC.409.C32_at      | PTP4A2   | Transcribed locus                                                                                                              | 0.0357 | 1.80 |
| ADXECAD.22145_s_at    | GSR      | glutathione reductase (GSR) mRNA.                                                                                              | 0.0363 | 1.79 |
| ADXEC.3211.C2_s_at    | RBM39    | RNA binding motif protein 39                                                                                                   | 0.0417 | 1.79 |
| ADXEC.11161.C1-a_s_at | KIF5B    | kinesin family member 5B (KIF5B) mRNA.                                                                                         | 0.0217 | 1.79 |
| ADXECRS.6844_at       | ADAM10   | ADAM metallopeptidase domain 10 (ADAM10) mRNA.                                                                                 | 0.037  | 1.78 |
| ADXEC.409.C56_s_at    | PTP4A2   | Transcribed locus                                                                                                              | 0.0398 | 1.77 |
| ADXEC.6728.C2_at      | PTP4A1   | protein tyrosine phosphatase type IVA member 1                                                                                 | 0.0382 | 1.75 |
| ADXEC.3642.C2_s_at    | MLF2     | myeloid leukemia factor 2 (MLF2) transcript variant                                                                            | 0.032  | 1.74 |
| ADXEC.7693.C1_x_at    | MBTD1    | mbt domain containing 1 (MBTD1) mRNA.                                                                                          | 0.0341 | 1.74 |
| ADXEC.14337.C2_at     | PPP1R15B | protein phosphatase 1 regulatory (inhibitor) subunit<br>cDNA FLJ58787 complete cds highly similar to<br>Cleavagestimulation fa | 0.0107 | 1.73 |
| ADXEC.14780.C2_s_at   | CSTF2    | polymerase (DNA directed) epsilon 3 (p17 subunit)                                                                              | 0.0214 | 1.72 |
| ADXEC.1048.C1_x_at    | POLE3    | polymerase (DNA directed) epsilon 3 (p17 subunit)                                                                              | 0.0238 | 1.72 |
| ADXEC.9082.C1-a_s_at  | SRP68    | signal recognition particle 68kDa (SRP68) mRNA.                                                                                | 0.05   | 1.72 |
| ADXEC.7383.C1_x_at    | ZNF639   | zinc finger protein 639 (ZNF639) mRNA.                                                                                         | 0.0033 | 1.71 |
| ADXEC.33954.C1_x_at   | TBRG4    | mRNA for KIAA0948 protein partial cds.                                                                                         | 0.0078 | 1.71 |
| ADXEC.7383.C1_at      | ZNF639   | zinc finger protein 639 (ZNF639) mRNA.                                                                                         | 0.0264 | 1.70 |

|                       |          |                                                                                  |        |      |
|-----------------------|----------|----------------------------------------------------------------------------------|--------|------|
| ADXEC.9347.C1_s_at    | UFC1     | Ubiquitin-fold modifier conjugating enzyme 1                                     | 0.05   | 1.70 |
| ADXECAD.11135_at      | SFRS3    | Splicing factor arginine/serine-rich 3                                           | 0.0168 | 1.69 |
| ADXEC.14372.C2_s_at   | WEE1     | WEE1 homolog (S. pombe) (WEE1) transcript variant 1                              | 0.05   | 1.69 |
| ADXEC.2954.C1_at      | SERP1    | stress-associated endoplasmic reticulum protein 1                                | 0.0081 | 1.68 |
| ADXEC.3268.C1_at      | ASF1B    | ASF1 anti-silencing function 1 homolog B                                         | 0.0233 | 1.67 |
| ADXEC.7693.C1_at      | MBTD1    | mbt domain containing 1 (MBTD1) mRNA.                                            | 0.05   | 1.67 |
| ADXEC.22227.C1_s_at   | FNBP1    | Formin binding protein 1                                                         | 0.0132 | 1.66 |
| ADXEC.9171.C1_at      | USP34    | Ubiquitin specific peptidase 34                                                  | 0.05   | 1.65 |
| ADXEC.29585.C1_at     | C11orf58 | Chromosome 11 open reading frame 58                                              | 0.0424 | 1.64 |
| ADXEC.6014.C1_at      | CAND1    | Cullin-associated and neddylation-dissociated 1                                  | 0.0317 | 1.64 |
| ADXECS.19560_s_at     | BZW1     | basic leucine zipper and W2 domains 1 (BZW1) mRNA.                               | 0.0221 | 1.64 |
| ADXECADA.18789_at     | CENPK    | centromere protein K (CENPK) mRNA.                                               | 0.0365 | 1.64 |
| ADXEC.14865.C2_s_at   | SS18     | synovial sarcoma translocation chromosome 18 (SS18)                              | 0.0327 | 1.64 |
| ADXPCEC.16122.C1_at   | HIATL1   | hippocampus abundant transcript-like 1                                           | 0.05   | 1.63 |
| ADXECAD.14311_at      | UFM1     | Ubiquitin-fold modifier 1                                                        | 0.0084 | 1.61 |
| ADXPCEC.11965.C1_x_at | TMEM165  | Transmembrane protein 165                                                        | 0.0363 | 1.61 |
| ADXEC.23157.C1_s_at   | GNAI3    | guanine nucleotide binding protein (G protein) alpha inhibiting activity polypep | 0.0316 | 1.60 |
| ADXEC.7681.C1_s_at    | SMC2     | structural maintenance of chromosomes 2 (SMC2)                                   | 0.0051 | 1.60 |
| ADXEC.4544.C1_at      | RGS19    | regulator of G-protein signaling 19 (RGS19)                                      | 0.0436 | 1.60 |
| ADXEC.7696.C1-a_s_at  | STX12    | syntaxin 12 (STX12) mRNA.                                                        | 0.05   | 1.57 |
| ADXECAD.16985_s_at    | PA2G4    | proliferation-associated 2G4 38kDa (PA2G4) mRNA.                                 | 0.05   | 1.57 |
| ADXEC.1690.C5_s_at    | GNB1     | guanine nucleotide binding protein (G protein) beta                              | 0.0021 | 1.56 |
| ADXECS.4234_s_at      | CAP1     | CAP adenylate cyclase-associated protein 1 (yeast)                               | 0.0265 | 1.56 |
| ADXECAD.9888_x_at     | ROCK1    | Rho-associated coiled-coil containing protein kinase                             | 0.042  | 1.56 |
| ADXECEMUTR.1821_s_at  | PVRL3    | poliovirus receptor-related 3 mRNA (cDNA cloneIMAGE:4066485) comple              | 0.05   | 1.56 |
| ADXEC.5984.C1_at      | ARF4     | ADP-ribosylation factor 4 (ARF4) mRNA.                                           | 0.05   | 1.55 |
| ADXEC.2886.C2-a_s_at  | GOLPH3   | golgi phosphoprotein 3 (coat-protein) (GOLPH3) mRNA.                             | 0.0146 | 1.55 |
| ADXECAD.23957_s_at    | BACH1    | BTB and CNC homology 1 basic leucine zipper                                      | 0.0088 | 1.54 |
| ADXEC.2959.C3_s_at    | COPG     | coatomer protein complex subunit gamma (COPG) mRNA.                              | 0.05   | 1.54 |
| ADXEC.16562.C1_s_at   | CCNJ     | cyclin J (CCNJ) transcript variant 3 mRNA.                                       | 0.0251 | 1.54 |
| ADXEC.6599.C1_s_at    | FAM50A   | family with sequence similarity 50 member A (FAM50A)                             | 0.05   | 1.54 |
| ADXEC.6728.C2_x_at    | PTP4A1   | protein tyrosine phosphatase type IVA member 1                                   | 0.05   | 1.53 |
| ADXECAD.9650_at       | MAT2A    | methionine adenosyltransferase II alpha (MAT2A)                                  | 0.0263 | 1.53 |
| ADXECAD.9888_at       | ROCK1    | Rho-associated coiled-coil containing protein kinase                             | 0.0043 | 1.53 |

|                       |           |                                                                                     |        |      |
|-----------------------|-----------|-------------------------------------------------------------------------------------|--------|------|
| ADXECADA.13461_at     | PPIE      | Peptidylprolyl isomerase E (cyclophilin E)                                          | 0.0285 | 1.53 |
| ADXEC.2744.C2_s_at    | CTTN      | cortactin (CTTN) transcript variant 1 mRNA.                                         | 0.0451 | 1.53 |
| ADXEC.719.C1_s_at     | LMNB2     | lamin B2 (LMNB2) mRNA.                                                              | 0.0343 | 1.52 |
| ADXEC.1114.C2-a_s_at  | CAPZA1    | capping protein (actin filament) muscle Z-line alpha                                | 0.0212 | 1.52 |
| ADXEC.2206.C2_at      | NDUFC1    | NADH dehydrogenase (ubiquinone) 1 subcomplex unknown 1<br>6kDa                      | 0.032  | 1.52 |
| ADXECAD.1571_s_at     | ASAH1     | N-acylsphingosine amidohydrolase (acid ceramidase) 1                                | 0.037  | 1.52 |
| ADXECADA.16206_at     | ARFGEF1   | ADP-ribosylation factor guanine nucleotide-exchange factor<br>1(brefeldin A-inhibit | 0.0338 | 1.52 |
| ADXECADA.24708_s_at   | TNKS2     | tankyrase TRF1-interacting ankyrin-related ADP-ribose                               | 0.05   | 1.52 |
| ADXPCEC.15490.C1_s_at | SMAD2     | SMAD family member 2 (SMAD2) transcript variant 1                                   | 0.0206 | 1.51 |
| ADXOCEC.2903.C1_s_at  | UBE2D2    | ubiquitin-conjugating enzyme E2D 2 (UBC4/5 homolog                                  | 0.0138 | 1.51 |
| ADXEC.1260.C8_s_at    | PSMB4     | Proteasome (prosome macropain) subunit beta type 4                                  | 0.0297 | 1.51 |
| ADXEC.2291.C1_x_at    | NDUFV2    | NDUFV2 gene for 24-kDa subunit of complex I partial cds.                            | 0.0189 | 1.51 |
| ADXEC.11953.C2_s_at   | APAF1     | apoptotic peptidase activating factor 1 (APAF1)                                     | 0.0069 | 1.51 |
| ADXECAD.26276_at      | GNA13     | guanine nucleotide binding protein (G protein) alpha                                | 0.0273 | 1.51 |
| ADXECADA.253_s_at     | KIAA1524  | KIAA1524 (KIAA1524) mRNA.                                                           | 0.0123 | 1.50 |
| ADXECEMUTR.410_at     | WDR26     | WD repeat domain 26 (WDR26) transcript variant 1                                    | 0.0473 | 1.49 |
| ADXEC.7491.C1_x_at    | DNAJC9    | DnaJ (Hsp40) homolog subfamily C member 9                                           | 0.05   | 1.48 |
| ADXECAD.1_at          | SCARB1    | Scavenger receptor class B member 1                                                 | 0.0261 | 1.48 |
| ADXECADA.21050_at     | SLC4A7    | solute carrier family 4 sodium bicarbonate                                          | 0.0227 | 1.47 |
| ADXECADA.17436_s_at   | FOXK2     | forkhead box K2 (FOXK2) mRNA.                                                       | 0.0252 | 1.47 |
| ADXECAD.23807_s_at    | ING1      | inhibitor of growth family member 1 (ING1)                                          | 0.0342 | 1.46 |
| ADXECNTDJ.676_at      | FIP1L1    | FIP1 like 1 (S. cerevisiae) (FIP1L1) transcript                                     | 0.0061 | 1.46 |
| ADXEC.2577.C1-a_s_at  | ABCE1     | ATP-binding cassette sub-family E (OABP) member 1                                   | 0.0432 | 1.46 |
| ADXEC.1945.C5_s_at    | IPO7      | importin 7 (IPO7) mRNA.                                                             | 0.023  | 1.46 |
| ADXEC.121.C1_s_at     | ARL5A     | ADP-ribosylation factor-like 5A (ARL5A) transcript                                  | 0.0123 | 1.46 |
| ADXEC.505.C3_x_at     | MPHOSPH10 | M-phase phosphoprotein 10 (U3 small nucleolar                                       | 0.0251 | 1.45 |
| ADXEC.11961.C1_at     | AQR       | aquarius homolog (mouse) (AQR) mRNA.                                                | 0.018  | 1.44 |
| ADXECAD.4765_x_at     | LIMS1     | LIM and senescent cell antigen-like domains 1                                       | 0.0267 | 1.44 |
| ADXECADA.1528_s_at    | CCNJ      | cyclin J (CCNJ) transcript variant 3 mRNA.                                          | 0.0207 | 1.44 |
| ADXEC.15900.C1-a_s_at | FAM60A    | family with sequence similarity 60 member A (FAM60A)                                | 0.0263 | 1.43 |
| ADXECAD.20409_s_at    | IVNS1ABP  | influenza virus NS1A binding protein (IVNS1ABP) mRNA.                               | 0.0422 | 1.43 |
| ADXECAD.20345_s_at    | RAD23B    | RAD23 homolog B (S. cerevisiae) (RAD23B) mRNA.                                      | 0.0065 | 1.42 |
| ADXECNTDJ.4261_s_at   | ANAPC4    | anaphase promoting complex subunit 4 (ANAPC4) mRNA.                                 | 0.0335 | 1.42 |
| ADXEC.1119.C2_s_at    | HMGB2     | high-mobility group box 2 (HMGB2) transcript variant                                | 0.0455 | 1.40 |

|                       |          |                                                                          |        |      |
|-----------------------|----------|--------------------------------------------------------------------------|--------|------|
| ADXEC.20377.C1-a_s_at | SOAT1    | sterol O-acyltransferase 1 (SOAT1) transcript variant                    | 0.0241 | 1.40 |
| ADXECAD.5485_at       | INTS7    | Integrator complex subunit 7                                             | 0.0376 | 1.40 |
| ADXEC.5198.C2_s_at    | HSPA4    | heat shock 70kDa protein 4 (HSPA4) mRNA.                                 | 0.0442 | 1.40 |
| ADXEC.19665.C1-a_s_at | NNT      | nicotinamide nucleotide transhydrogenase (NNT)                           | 0.05   | 1.39 |
| ADXEC.25009.C1_x_at   | ZRANB2   | Zinc finger RAN-binding domain containing 2                              | 0.0074 | 1.39 |
| ADXEC.7650.C2_at      | TNPO1    | transportin 1 (TNPO1) transcript variant 2 mRNA.                         | 0.036  | 1.38 |
| ADXEC.913.C1_at       | SLTM     | SAFB-like transcription modulator (SLTM) transcript                      | 0.0306 | 1.37 |
| ADXEC.33040.C1_x_at   | KIAA1161 | KIAA1161 (KIAA1161) mRNA.                                                | 0.0202 | 1.36 |
| ADXEC.5035.C3_x_at    | PABPC1   | poly(A) binding protein cytoplasmic 1 (PABPC1) mRNA.                     | 0.0417 | 1.35 |
| ADXEC.1104.C1_at      | PSMD12   | proteasome (prosome macropain) 26S subunit                               | 0.0389 | 1.34 |
| ADXEC.6634.C2_at      | PAPOLA   | Poly(A) polymerase alpha                                                 | 0.0113 | 1.34 |
| ADXEC.8227.C2_s_at    | ARF6     | ADP-ribosylation factor 6 (ARF6) mRNA.                                   | 0.0159 | 1.34 |
| ADXEC.9641.C1_s_at    | ETF1     | eukaryotic translation termination factor 1 (ETF1)                       | 0.0209 | 1.34 |
| ADXECAD.9838_s_at     | RRBP1    | Ribosome binding protein 1 homolog 180kDa (dog)                          | 0.0054 | 1.34 |
| ADXEC.7837.C1_at      | ANP32E   | acidic (leucine-rich) nuclear phosphoprotein 32                          | 0.0079 | 1.33 |
| ADXEC.2424.C1_s_at    | SERP1    | stress-associated endoplasmic reticulum protein 1                        | 0.0141 | 1.32 |
| ADXEC.3894.C1_at      | SH3GLB1  | SH3-domain GRB2-like endophilin B1 (SH3GLB1) mRNA.                       | 0.0238 | 1.32 |
| ADXEC.12233.C1_at     | PYCR2    | pyrroline-5-carboxylate reductase family member 2                        | 0.0418 | 1.31 |
| ADXEC.6911.C2_s_at    | PKN2     | protein kinase N2 (PKN2) mRNA.                                           | 0.035  | 1.31 |
| ADXEC.7849.C1_at      | KIF5B    | kinesin family member 5B (KIF5B) mRNA.                                   | 0.0283 | 1.31 |
| ADXEC.3334.C1-a_s_at  | STX7     | syntaxin 7 (STX7) mRNA.                                                  | 0.0354 | 1.29 |
| ADXECAD.19045_at      | TM9SF3   | transmembrane 9 superfamily member 3 (TM9SF3) mRNA.                      | 0.0027 | 1.29 |
| ADXEC.11850.C1_at     | RSU1     | Ras suppressor protein 1 (RSU1) transcript variant 1                     | 0.05   | 1.28 |
| ADXEC.2886.C1_at      | GOLPH3   | golgi phosphoprotein 3 (coat-protein) (GOLPH3) mRNA.                     | 0.05   | 1.26 |
| ADXEC.21117.C1_at     | ROD1     | ROD1 regulator of differentiation 1 (S. pombe) (ROD1)                    | 0.05   | 1.26 |
| ADXEC.3576.C1_x_at    | LAMP2    | lysosomal-associated membrane protein 2 (LAMP2)                          | 0.0137 | 1.25 |
| ADXECRS.13131_at      | BIRC5    | baculoviral IAP repeat-containing 5 (BIRC5)                              | 0.05   | 1.25 |
| ADXECAD.12808_at      | PTPN1    | Protein tyrosine phosphatase non-receptor type 1                         | 0.0239 | 1.24 |
| ADXECADA.10529_s_at   | ARF6     | ADP-ribosylation factor 6 (ARF6) mRNA.                                   | 0.05   | 1.23 |
| ADXECRS.13131_x_at    | BIRC5    | baculoviral IAP repeat-containing 5 (BIRC5)                              | 0.0444 | 1.22 |
| ADXEC.21002.C1_at     | EIF4G2   | eukaryotic translation initiation factor 4 gamma 2                       | 0.036  | 1.21 |
| ADXEC.242.C1_x_at     | UBE2D3   | ubiquitin-conjugating enzyme E2D 3 (UBC4/5 homolog                       | 0.0232 | 1.20 |
| ADXEC.10563.C1_at     | SMARCA4  | SWI/SNF related matrix associated actin dependent regulator of chromatin | 0.0277 | 1.19 |
| ADXEC.8227.C1-a_s_at  | ARF6     | ADP-ribosylation factor 6 (ARF6) mRNA.                                   | 0.0313 | 1.17 |
| ADXEC.3746.C2-a_s_at  | KIF2C    | kinesin family member 2C (KIF2C) mRNA.                                   | 0.0353 | 1.16 |

ADXEC.3261.C2\_at

TM7SF2

putative sterol reductase SR-1 (TM7SF2) gene complete cds. 0.0264

1.15

---
