# Supplementary material
Source: PubMed Central journal article supplement (PMC3142463)
Supplement: cc1011_1794SD14.pdf [file cc1011_1794SD14.pdf]

**Supplemental Table 14. Intersection with Aging Associated Genes.**

| <u>Probe</u>          | <u>Symbol</u> | <u>Description</u>                                                   | <u>P-value</u> | <u>Fold-Change</u> |
|-----------------------|---------------|----------------------------------------------------------------------|----------------|--------------------|
| ADXEC.7503.C1_s_at    | DPP3          | dipeptidyl-peptidase 3                                               | 0.02           | 3.50               |
| ADXEC.1082.C15_s_at   | TPM3          | tropomyosin 3 .                                                      | 0.02           | 3.34               |
| ADXECAD.8596_s_at     | PARVG         | parvin gamma                                                         | 0.03           | 3.21               |
| ADXECAD.23267_s_at    | MSR1          | macrophage scavenger receptor 1                                      | 0.01           | 3.15               |
| ADXLCEC.4623.C1_at    | MSR1          | macrophage scavenger receptor 1                                      | 0.02           | 1.81               |
| ADXECADA.11237_at     | PPP2R5C       | PP2A B56 gamma                                                       | 0.02           | 3.00               |
| ADXECRS.22704_s_at    | PSMB9         | proteasome (prosome macropain) subunit beta type 9                   | 0.003          | 2.98               |
| ADXECNTDJ.7829_s_at   | CD53          | CD53 molecule                                                        | 0.004          | 2.87               |
| ADXEC.8794.C1_at      | CD53          | CD53 molecule                                                        | 0.04           | 1.92               |
| ADXEC.8794.C1_x_at    | CD53          | CD53 molecule                                                        | 0.04           | 1.76               |
| ADXEC.16064.C1_s_at   | SLAMF8        | SLAM family member 8                                                 | 0.01           | 2.77               |
| ADXEC.583.C2_s_at     | C1QB          | complement component 1 q subcomponent B chain                        | 0.04           | 2.63               |
| ADXEC.98.C2_x_at      | TUBB          | tubulin beta                                                         | 0.03           | 2.52               |
| ADXECADA.9979_at      | VAMP1         | vesicle-associated membrane protein 1                                | 0.02           | 2.35               |
| ADXEC.3788.C1_s_at    | TBXAS1        | thromboxane A synthase 1 (platelet)                                  | 0.007          | 2.35               |
| ADXPCEC.16852.C1_at   | CCDC45        | coiled-coil domain containing 45                                     | 0.04           | 2.35               |
| ADXECNTDJ.3106_at     | TNC           | tenascin C                                                           | 0.05           | 2.35               |
| ADXEC.6557.C2_s_at    | HTATIP2       | HIV-1 Tat interactive protein 2 30kDa                                | 0.02           | 2.33               |
| ADXECAD.22624_at      | ST8SIA4       | ST8 alpha-N-acetyl-neuraminide                                       | 0.03           | 2.26               |
| ADXEC.16157.C1_s_at   | ALOX5         | arachidonate 5-lipoxygenase                                          | 0.03           | 2.25               |
| ADXEC.33764.C1_s_at   | MAP3K8        | mitogen-activated protein kinase kinase kinase 8                     | 0.03           | 2.24               |
| ADXEC.3159.C2_s_at    | PARP12        | poly (ADP-ribose) polymerase family member 12                        | 0.05           | 2.23               |
| ADXEC.23032.C1_at     | CD68          | CD68 molecule.                                                       | 0.04           | 2.21               |
| ADXEC.23032.C1_x_at   | CD68          | CD68 molecule                                                        | 0.04           | 2.18               |
| ADXEC.15673.C1_s_at   | RAB8B         | RAB8B member RAS oncogene family                                     | 0.04           | 2.19               |
| ADXEC.19598.C1_at     | MS4A6A        | cDNA FLJ60178 complete cds moderately similar to Membrane-spanning 4 | 0.05           | 2.18               |
| ADXEC.9246.C1_at      | NRP1          | neuropilin 1                                                         | 0.05           | 2.15               |
| ADXEC.27117.C1-a_s_at | STAT6         | signal transducer and activator of transcription 6                   | 0.03           | 2.15               |
| ADXECNTDJ.2873_s_at   | CTSZ          | cathepsin Z                                                          | 0.04           | 2.14               |
| ADXEC.8915.C1-a_s_at  | PTPRC         | protein tyrosine phosphatase receptor type C                         | 0.04           | 2.12               |
| ADXEC.17916.C1_at     | RAB14         | RAB14 member RAS oncogene family                                     | 0.04           | 2.11               |
| ADXEC.2358.C2_s_at    | SYNGR2        | synaptogyrin 2                                                       | 0.05           | 2.05               |

|                      |           |                                                                                  |        |      |
|----------------------|-----------|----------------------------------------------------------------------------------|--------|------|
| ADXECAD.7088_at      | RUFY1     | RUN and FYVE domain containing 1                                                 | 0.04   | 2.01 |
| ADXECRS.8168_s_at    | CSF1R     | colony stimulating factor 1 receptor                                             | 0.05   | 1.98 |
| ADXEC.13314.C1_at    | ARHGEF6   | Rac/Cdc42 guanine nucleotide exchange factor (GEF) 6                             | 0.03   | 1.96 |
| ADXEC.15087.C2_x_at  | SYMPK     | symplekin                                                                        | 0.007  | 1.92 |
| ADXECNTDJ.5628_s_at  | STAB1     | stabilin 1                                                                       | 0.05   | 1.88 |
| ADXEC.6036.C1_s_at   | REEP4     | receptor accessory protein 4                                                     | 0.006  | 1.88 |
| ADXEC.8949.C1_s_at   | PARVG     | parvin gamma                                                                     | 0.005  | 1.85 |
| ADXEC.15087.C2_s_at  | SYMPK     | symplekin                                                                        | 0.02   | 1.84 |
| ADXEC.15087.C1_x_at  | SYMPK     | symplekin                                                                        | 0.05   | 1.47 |
| ADXECAD.19560_at     | MAR1      | membrane-associated ring finger (C3HC4) 1                                        | 0.02   | 1.78 |
| ADXEC.9707.C1_at     | LAPTM5    | lysosomal protein transmembrane 5                                                | 0.03   | 1.78 |
| ADXEC.20402.C1_s_at  | CORO1C    | coronin actin binding protein 1C                                                 | 0.04   | 1.77 |
| ADXEC.1926.C1_s_at   | TYROBP    | TYRO protein tyrosine kinase binding protein                                     | 0.0008 | 1.75 |
| ADXEC.22969.C1_at    | TRIM22    | tripartite motif-containing 22                                                   | 0.02   | 1.74 |
| ADXEC.4627.C3_s_at   | SLC15A3   | solute carrier family 15 member 3                                                | 0.03   | 1.74 |
| ADXEC.32407.C1_x_at  | AXL       | AXL receptor tyrosine kinase                                                     | 0.01   | 1.74 |
| ADXEC.20525.C1_s_at  | LST1      | leukocyte specific transcript 1                                                  | 0.04   | 1.73 |
| ADXEC.23136.C1_s_at  | LOC150166 | Hypothetical protein LOC150166                                                   | 0.04   | 1.73 |
| ADXEC.3377.C1_s_at   | CTSS      | cathepsin S                                                                      | 0.01   | 1.72 |
| ADXEC.3331.C1_s_at   | APBB1IP   | amyloid beta (A4) precursor protein-binding familyB member1 interacting protein  | 0.02   | 1.71 |
| ADXEC.20525.C2_s_at  | LST1      | leukocyte specific transcript 1                                                  | 0.04   | 1.69 |
| ADXEC.22969.C1_s_at  | TRIM22    | tripartite motif-containing 22                                                   | 0.03   | 1.68 |
| ADXEC.2751.C1_at     | RHOG      | ras homolog gene family member G                                                 | 0.005  | 1.67 |
| ADXEC.22227.C1_s_at  | FNBP1     | Formin binding protein 1                                                         | 0.01   | 1.66 |
| ADXECNTDJ.546_s_at   | SLC15A3   | solute carrier family 15 member 3                                                | 0.03   | 1.66 |
| ADXEC.8269.C1_s_at   | PTGS1     | prostaglandin-endoperoxide synthase 1                                            | 0.04   | 1.63 |
| ADXECNTDJ.82_s_at    | FYB       | FYN binding protein                                                              | 0.05   | 1.60 |
| ADXEC.4544.C1_at     | RGS19     | regulator of G-protein signaling 19                                              | 0.04   | 1.60 |
| ADXEC.7567.C1_s_at   | CCDC23    | coiled-coil domain containing 23                                                 | 0.01   | 1.59 |
| ADXEC.32536.C1_at    | ABCC1     | ATP-binding cassette sub-family C (CFTR/MRP) member 1                            | 0.02   | 1.55 |
| ADXEC.20738.C1_at    | DOK1      | docking protein 1 62kDa (downstream of tyrosine                                  | 0.03   | 1.55 |
| ADXEC.8260.C2_s_at   | CSNK1D    | casein kinase 1 delta                                                            | 0.05   | 1.52 |
| ADXECNTDJ.4604_at    | BTN3A3    | butyrophilin subfamily 3 member A3                                               | 0.05   | 1.50 |
| ADXLCEC.7884.C1_s_at | PTPRE     | protein tyrosine phosphatase receptor type E                                     | 0.03   | 1.49 |
| ADXECAD.22835_x_at   | RAC2      | ras-related C3 botulinum toxin substrate 2 (rho family small GTP binding protein | 0.05   | 1.46 |
| ADXECNTDJ.7917_at    | C22orf9   | chromosome 22 open reading frame 9                                               | 0.04   | 1.43 |

|                    |         |                                           |       |      |
|--------------------|---------|-------------------------------------------|-------|------|
| ADXEC.1477.C4_x_at | BTN3A3  | butyrophilin subfamily 3 member A3        | 0.02  | 1.41 |
| ADXEC.1884.C4_x_at | PFN1    | profilin 1                                | 0.03  | 1.38 |
| ADXEC.2294.C1_x_at | ARHGDIB | Rho GDP dissociation inhibitor (GDI) beta | 0.009 | 1.32 |
| ADXEC.2294.C1_at   | ARHGDIB | Rho GDP dissociation inhibitor (GDI) beta | 0.05  | 1.24 |
| ADXEC.931.C1_s_at  | GPX1    | glutathione peroxidase 1                  | 0.05  | 1.26 |
